# Supplementary material for: Stromatolite reef from the Early Archaean era of Australia
Source: Springer Nature journal article supplement (doi:10.1038/nature04764), 2006-06-01
Supplement: 41586_2006_BFnature04764_MOESM1_ESM.pdf [file 41586_2006_BFnature04764_MOESM1_ESM.pdf]

# **Supplementary data and discussion to: “Stromatolite reef from the Early Archaean era of Australia”**

## **1: Stratigraphy and facies**

### **Location of study area**

The study area occurs on the southern flank of the North Pole Dome in the East Pilbara Granite-Greenstone Terrane. Grid coordinates for the location of the studied outcrops are held by the Geological Survey of Western Australia.

### **Basal unconformity and underlying unit descriptions**

The character of the lower boundary of the Strelley Pool Chert varies laterally across the study area (Supplementary Figure 2). In all places the contact shows erosional relief, but the underlying rock types, their structural orientation, and the amount of time represented at the unconformity vary significantly along strike. In most places, particularly in the southern study area, the formation was deposited over a suite of older, altered basaltic rocks—or ‘palaeoalterite’<sup>28</sup> (i.e. a nonconformable contact). The palaeoalterite contains devitrification ocilli, remnant basalt pillows (lower in the section) and zones with foliated or schistose fabric. Elsewhere along strike, particularly in the northern study area, the Strelley Pool Chert was deposited over eroded sedimentary rocks with bedding oriented essentially parallel to Strelley Pool Chert bedding (i.e. a disconformable contact). The sedimentary rocks vary laterally between: 1) thinly bedded, grey-green, tuffaceous, pebble to boulder-bearing mudstones and flow banded pebbly tuff; and, 2) bedded, jasper-banded black chert. Significantly, the bedded fabric of the jasper—which contains iron oxide in the form of the mineral hematite—and its presence in clasts of overlying beds demonstrates that the jasper is not a product of later diagenesis or recent weathering, and that iron oxide-forming sedimentary environments existed prior to 3.43 Ga. The relative abundances of rare earth elements (REE) in the jasper-banded black chert, which

occurs at the uppermost part of the palaeoalterite suite of rocks, indicate a primary hydrothermal origin for the chert and jasper (see ‘Rare earth element chemistry’ below).

The tuffaceous pebble to boulder-bearing mudstone overlies—and contains clasts of—the jasper-banded black chert. The upper contact of the mudstone shows alteration features including white discoloration, carbonate-filled downward-tapering cracks, bedding-plane parallel cracks, and larger fissures and cavities filled with carbonate matrix-supported chert gravel conglomerate (Supplementary Figure 3). Those features are most prominent at the unconformity and decrease downward over a stratigraphic depth of around one metre, suggesting they were caused by Early Archaean surface weathering of the mudstones prior to Strelley Pool Chert deposition. Significantly, the presence of soft intraclasts of the mudstone in the basal conglomerate of the Strelley Pool Chert indicates that the mudstones were not fully lithified when deposition of the Strelley Pool Chert began. The softness of the clasts is indicated by the presence of jellybean-shaped and wasp-waisted clasts, and pinched-off stringers trailing from some clasts (Supplementary Figure 7). The assemblage of sediment-filled crack networks, fissures, cavities, potholes and soft mud intraclasts closely resembles features developed on modern coastlines such as at Formby Point, northwest England, where intertidal weathering processes create desiccation crack networks, shallow erosional features and local mud intraclast deposits over semi-lithified late Holocene (up to 5,900 year-old) mudstones<sup>29</sup>. The semi-lithified state of mudstones underlying the Strelley Pool Chert suggests a similarly short period of time passed between deposition from the mudstones (which belong to the 3.43 Ga Panorama Formation) and onset of Strelley Pool Chert deposition.

### **Member 1 description**

Distribution and geometry: Member 1 (M1) of the Strelley Pool Chert is present discontinuously across the entire study area: it is present in all places where the substrate is jasper-banded black chert or tuffaceous mudstone, but is present in only some places where the substrate is palaeoalterite. Thus, M1 conglomerate is best developed in the central to northern study area, particularly along parts of “North Shaw Ridge”, “Anchor Ridge” and “Steer Ridge” where jasper-banded black chert substrates are most prevalent.

The conglomerate commonly fills decimetre to metre-scale topographic relief in the unconformity.

Fabric: Clasts in M1 are dominantly sub-rounded to well rounded and poorly sorted, with moderate to low sphericity and grain size ranging from 0.02 to >2 metres. The composition is 65-95% chert clasts (jasper-banded, grey or black) and 5-30% grey-green tuffaceous mudstone and grey-green chert clasts, with 5% matrix of medium grained brown crystalline carbonate—locally with angular to rounded chert sand or gravel.

Lateral variations: Lateral changes in the character and thickness of the conglomerate correlate with lateral changes in the substrate lithology. Where the conglomerate overlies jasper-banded black chert, it forms a massive, 0.5 to 3.0 metre-thick bed composed almost entirely of large boulders of jasper-banded black chert with almost no matrix (Supplementary Figure 4-6). Rare carbonate clasts are present in some localities (Supplementary Figure 5). The boulders occur in clusters or in isolation, so that the bed thickness is commonly determined by the size of the largest chert clast. Bed thickness and geometry are also controlled by the metre-scale relief of the underlying chert substrate (e.g. Supplementary Figure 6). In at least one locality a ~2.5 metre-high chert palaeo cliff occurs at the unconformity (Supplementary Figure 3c), and boulders rest on a palaeo ‘platform’ on the stratigraphically higher side of the cliff.

Where the substrate changes laterally to tuffaceous mudstone, the grainsize of the conglomerate diminishes to cobble/pebble with some small boulders; the proportion of mudstone clasts increases (from less than 5% to as much as 30%); and some coarse bedding becomes apparent. For example, conglomerates overlying mudstone on southern “North Shaw Ridge” have three beds with grainsize varying between boulder and small cobble. Where M1 overlies altered basalt, the conglomerate is typically absent (Supplementary Figure 8), but—where present—forms a thin, discontinuous layer of boulders and cobbles.

### **Member 1 interpretation: Rocky shoreline**

The interpretation of M1 as a rocky shoreline deposit is entirely consistent with its position over an unconformity. However, the stratigraphic position alone is insufficient evidence for the interpretation<sup>30</sup>. There are several additional compelling lines of evidence that the basal member of the Strelley Pool Chert was deposited in a rocky shoreline environment. Firstly, the wide extent of the deposit is consistent with the broad march of a transgressing coastline. Secondly, the lateral correlation between the percentage of different clast types in the conglomerate and the lithology of the substrate, combined with the mature (rounded and clast-supported) fabric of the conglomerate clearly indicate that M1 was eroded and winnowed *in-situ* by high energy conditions that did not cause significant lateral transport (in contrast to fluvial systems, for example). That is an unusual set of conditions that is characteristic of rocky shorelines. Combined with the presence of distinctive coastal erosion features such as boulder-strewn bedrock platforms, cliffs, and sediment-filled fissures, cavities and desiccation cracks, those attributes are strongly characteristic of a transgressive rocky shoreline environment.

In addition, the lateral association of facies in M1 is closely comparable with along-strike variations typical of modern rocky shorelines. Studies of rocky shorelines show that large, scattered boulders accumulate on high energy wave-cut platforms in headland areas formed over the more resistant substrates, whereas pebble/cobble/boulder beach deposits typically accumulate in embayments formed by the less-resistant substrates<sup>31</sup>. The beach conglomerates typically display up-beach grainsize trends that would form bedded conglomerate deposits. In contrast, headland conglomerates tend to consist of isolated and clustered boulders<sup>32</sup>. In the Strelley Pool Chert, a thin layer of clustered and isolated large boulders overlies the more resistant substrate (chert) and bedded, pebble to small boulder conglomerates overlie the less resistant substrate (mudstone and altered basalts). Thus, the observed lateral grainsize patterns and bedding architecture of Strelley Pool Chert M1 in relation to the substrate type follow the longshore patterns from headland to embayment in modern rocky shorelines. The intertidal facies association that occurs at the contact with mudstone substrates, described above, further supports the hypothesis that M1 was deposited on a shoreline. The preservation of ‘pockets’ of semi-

lithified mudstone, which would be relatively susceptible to erosion in the shoreline environment, suggests rapid transgression and burial.

Modern rocky shorelines that provide an excellent analogue for M1 occur on the southern and southwestern margins of Australia; for example, at Cape Leeuwin on the southwestern tip of the continent (Supplementary Figure 9). The key similarity lies in the low relief and slow erosion rates of the coast and hinterland, which contrast with the typically steep relief and rapid erosion of most modern rocky coasts<sup>33</sup>. As a result, terrigenous sediment influx to the shoreline is minimal, so that shoreline deposits are almost entirely derived from *in-situ* marine erosion of the coastal bedrock. The lack of allochthonous sediment in M1 is explained by such an analogue. Comparison with the coastline at Cape Leeuwin also shows that it is entirely possible that relief of the Strelley Pool Chert basal unconformity was limited to metre-scale features such as the palaeo cliff in Supplementary Figure 3c, and that transport of the boulders in the shoreline environment probably occurred entirely through marine processes. That is, boulders of M1 need not have been transported down a steep slope: in modern wave-cut platforms on the Hawaiian coast, boulders weighing up to 90 tonnes were not delivered to the platform by down-slope transport, but were in fact eroded by marine processes from a submerged cliff at the seaward edge of the platform and emplaced on the platform during storms. In addition, *in-situ* erosion and deposition of boulders and cobbles on the platform is found to be an ongoing process, with clasts liberated by marine and subaerial weathering along pre-existing fractures in the bedrock<sup>34</sup>. The low relief of the Cape Leeuwin and Hawaiian analogues also provide an explanation for the implied sudden drowning of the entire landmass at the M1-M2 contact (see discussion of M2 below).

## **Member 2 description**

Geometry and internal architecture: M2 is divided into three beds that are defined and separated by distinctive layers of evaporite crystal pseudomorphs at the top of bed 1 and 2 (Supplementary Figure 2, 6). The top of bed 3 varies laterally, with crystal pseudomorphs, carbonate breccia and erosion surfaces occurring at the upper contact. The bed 1 and bed 2 crystal layers are laterally extensive, continuous, consistent in

appearance, and relatively uniform in thickness across the study area. They are readily identifiable in different outcrops and occur at the top of similar vertical facies successions in adjacent outcrops. Local erosion surfaces occur at the top of the layers, clearly marking the end of a regressive depositional cycle (i.e. succession deposited during relative sea level fall). Some attributes of the crystal pseudomorph layer vary between north and south, and between bed 1 and bed 2. The erosion surfaces are more laterally extensive and cut down more sharply and deeply in the northern outcrops compared to the south, and in bed 1 compared to bed 2. The lower and upper boundaries of the bed 1 and bed 2 crystal layers are sharp in the southern and central outcrops, whereas in the northern outcrops the lower boundary is gradational. The gradation is expressed as a gradual up-section increase in the abundance and size of crystals through flat laminite and stromatolitic facies until, near the top of the bed, all other facies disappear and densely crowded, 20 to 40 cm-high crystals occupy the entire deposit.

Metre-scale variations in the thickness of M2 are apparent within individual outcrops measuring a few tens of metres along strike (e.g. Supplementary Figure 6). The thickness changes are largely controlled by relict topography of the unconformity, as well as relief created by the heterogeneous distribution of large boulders in the M1 conglomerate and local small-scale faulting. Most of the thickness variations are taken up in bed 1 and 2, which infill lows and onlap topographic highs. Local erosion surfaces at the top of bed 1 created further decimetre-scale topography that was infilled during bed 2 deposition. Bed 3 is relatively uniform in thickness, reflecting the infilled topography.

The upward trend toward uniform bed thickness and topographic infilling is matched by a trend of decreasing lateral facies variation. Lateral facies variations are most rapid and pronounced in bed 1, being apparent across tens of metres within individual outcrops. The facies variations in bed 1 correlate, in part, to lateral thickness variations in the bed. Bed 2 shows broader scale facies variations (hundreds of meters), whereas bed 3 consists of more or less the same facies across the study area.

In addition to the topographically-controlled thickness and facies variations, there is also a general southward thinning of the member and decreasing facies diversity. All

three beds are present (but thinner) as far south as the northern end of “Bierf Ridge” (Supplementary Figures 1, 2) Further south, however, the equivalent section at the southern end of “Bierf Ridge” consists of only two beds containing mostly wavy laminites and totalling less than three metres in thickness. Direct correlation of the beds is challenged by heavy faulting, shearing and silicification on the southern end of “Trendall Ridge” and the northern end of “Bierf Ridge”, but it is most likely that the two beds of wavy laminite on the southern end of “Bierf Ridge” represent the lateral equivalent of M2 bed 1 and 2. Bed 3 probably correlates to the lower part of the overlying, non-stromatolitic, laminated cherts.

#### Flat laminite facies

Flat laminite is the most abundant facies through most of M2. The facies consists of rhythmically-laminated dolomite and chert (Supplementary Figure 10), with laminae that are ~0.5 to 3 millimetres thick, parallel to undulose, with local graded fabric defined by changes in average size and proportion of neomorphic dolomite and quartz grains. In some areas the laminae are fine (<1 millimetre), parallel and relatively uniform in thickness. In other areas the laminae are thicker (1-3 millimetres) and show abundant tangential truncation (pinchout, downlap, scour, onlap) and thickness variations. Those features suggest the laminae had a significant component of loose granular sediment—probably micritic silt and sand—and were not entirely composed of chemical sediments. Flat laminite occurs as a depositional “background” to the other facies of M2, particularly in the central study area where massive flat lamination links stromatolitic pseudocolumns (see ‘Stromatolite characteristics and analysis’ below).

#### Flat pebble intraclast conglomerate facies

Flat pebble and edgewise intraclast conglomerates are common in bed 1 and bed 2 of M2. The conglomerate deposits have a lenticular geometry (commonly channel-fill) or wedge geometry (i.e. where stacked against stromatolites) and comprise millimetre-to-centimetre-long oblate clasts of reworked carbonate laminite deposited among flat laminae or in fenestral carbonate (Supplementary Figure 11). The flat pebble conglomerates are more abundant on “Trendall Ridge” and southern “North Shaw

Ridge”, where they commonly occur as imbricate stacks of pebble to cobble-sized plates piled up against conical stromatolites (see Figure 1k in main text). In similar settings in post-Archaean rocks, such conglomerates are commonly interpreted as storm and tidal channel deposits<sup>13</sup>. The source of many ripped-up clasts can be seen in the Trendall area, where flat laminite deposits are commonly broken and scoured. This suggests higher energy conditions prevailed in that area, in contrast to the northern outcrops, where laminae are generally more intact. It also suggests that the laminae were rapidly lithified after deposition.

### Fenestral carbonate facies

Fenestrae (a non-genetic term) are a type of open space structure associated with various wetting and drying processes, creation of gases (e.g. by microbes or decaying organic matter), evaporitic or replacement processes typically in supratidal settings. However, fenestrae also occur in a variety of other subaqueous settings<sup>13</sup>. Fenestrae in M2 occur as chert-filled voids in massive carbonate (Supplementary Figure 12). They are disseminated through the rock in three dimensions and display laminoid and irregular fabrics. They are cross cut by all later diagenetic features present in the rock, such as veins. Laminoid fenestrae are oriented parallel to bedding, even where bedding geometry is influenced by underlying topography (e.g; gentle upturn at onlapping margins). Thus, the fenestrae are syngenetic or very early diagenetic features and are not superficial structures related to later diagenetic processes. The fenestrae have irregular outlines and some have isopachous void-filling cements.

### Cracks

Areas of flat laminite and “small crested/conical laminites” (see below) in the Strelley Pool Chert are locally marked by downward-tapering, centimetre-deep/millimetre-wide cracks infilled with sediment (Supplementary Figure 10a). The geometry and infilling of the cracks are typical of structures formed by desiccation during subaerial exposure. They are distinct from syneresis (dewatering) cracks, which have ovate cross section geometry.



Bedding surface exposures on “Anchor Ridge” show a network of millimetre-wide crack-like features separating puzzle-fit laminae plates with curled-up edges (Supplementary Figure 10d). The surfaces may represent desiccated micrite layers, although—notably—the wrinkly profile and sinuous pattern of the cracks are similar to those formed by microbial mat desiccation or gas release from beneath microbially-bound sediment (“blister mats”) <sup>35</sup>.

### Evaporite crystal pseudomorph facies

The evaporite crystal pseudomorph facies consists of dolomite-replaced rod-shaped crystals with a pseudo-hexagonal cross section, striated sides and hollow or cemented centres. The original mineral has been replaced by medium-grained neomorphic dolomite. Due to the coarseness of dolomite recrystallization, no samples were suitable for accurate interfacial angle measurements to identify the precursor mineral.

The crystal morphology, which is easily ascertained in well-preserved outcrops where splays of crystals are exposed in three dimensions resembles one of the crystal habits of either aragonite or gypsum. Evaporite crystal fans occur locally in the cusp between encrusting/domical laminite domes at the base of bed 1/M2 and are themselves encrusted by subsequent laminae, indicating that the crystals stood high at the sediment-water interface during deposition. However, elsewhere the crystals cut across laminae, or remnant laminae are visible among crystals, indicating the crystals grew within the sediment pile.

The habit, geometry and stratigraphic location of the evaporitic crystal pseudomorph beds are similar to silicified ‘crystal fan’ beds, interpreted as evaporitic structures elsewhere in the Strelley Pool Chert<sup>2</sup>. The presence of the crystals, when considered alone, does not necessarily demonstrate evaporitic conditions. However, the coincidence of the crystals with other indications of shoaling water, particularly the eroded upper contacts, solution cavities and solution collapse breccia (see below; Supplementary Figures 6, 13), supports an evaporitic origin. The presence of the crystal beds, their karstification (see below) and their stratigraphic correlation at the top of bed 1

and 2 of M2 across the platform is consistent with multiple minor regressive sea-level cycles culminating in periods of restricted circulation and evaporitic deposition.

#### Local carbonate breccia and karst facies

Solution cavities and collapse breccias occur in association with evaporite deposits in M2. Breccia deposits are laterally restricted to decimetres or a few meters across and contain large blocks of bladed crystals, some in near puzzle-fit arrangement. Deposits have gradational to sharp lower and side boundaries that cross-cut stratigraphy, and are draped by overlying laminites. Those characteristics indicate that the breccias were formed *in-situ* at the surface and near-surface. On that basis the breccias are interpreted as early diagenetic evaporite solution collapse deposits rather than later diagenetic or tectonic breccia. In addition to the breccias there are also crystal-lined voids occurring locally within the evaporite crystal layers. In some instances the crystals point downward from the roof of the void, indicating their precipitation in a subsurface cavity. The cavity roofs commonly bow down to form a low area that was infilled by overlying laminae, indicating that the cavities were present in the near-subsurface during deposition of the infilling laminae. On the basis of those attributes, the cavities are most plausibly interpreted as near-surface evaporite solution cavities, or karst (Supplementary Figure 13).

#### Distal Laminite

The majority of the 70+ m-thick Strelley Pool Chert on the southern end of “Bierf Ridge” consists of finely laminated black and grey silicified rock (Supplementary Figure 14). The dark colouration is imparted by abundant semi-opaque silt sized grains, most of which are carbonate and some of which are carbonaceous clots and clasts. The carbonate grains are particularly abundant in the lower part of the succession. Locally, the laminae are convolute, forming south-verging recumbent folds (Supplementary Figure 15). The laminae above and below the folds are flat, indicating the folds formed by soft sediment slumping on a slope. Thus, the laminites are interpreted as silicified fine grained sediments deposited below the influence of waves, on a gentle slope facing approximately south. That hypothesis is borne out by the presence of an even thicker

succession of very finely laminated rock with rare south-verging convolute beds in outcrops a few kilometres to the south and southeast beyond the study area.

## **Member 2 interpretation: Transgressive isolated peritidal carbonate platform**

### Evidence for a marine environment

The three prime lines of evidence for a marine environment are: 1) the seawater REE signatures of primary carbonate and chert throughout the member; 2) the succession of shoreline to peritidal facies associations, and; 3) the complete cessation of clastic influx at the start of M2 deposition. The reasoning behind the third point is that if M2 were a non-marine deposit, some remnant of terrigenous sediment should be detected physically and/or chemically (in REE patterns of the carbonate and chert), which is not the case. The complete and sudden cessation of clastic sedimentation suggests that the erosional source was suddenly and completely submerged, as when rising sealevel finally drowns an isolated, low-relief landmass. The observation is difficult to explain in a non-marine setting where some vestige of terrigenous influx should remain, and is most plausibly explained by the drowning of a landmass that had low enough relief to be rapidly submerged.

### Evidence for a peritidal setting

Many characteristics of peritidal carbonates, including those cited here, may also be found in other sedimentary environments. That is, peritidal carbonates may not contain any single, truly diagnostic tidally-influenced features. Thus, interpretation of a peritidal environment should be made on the basis of a number of associated observations and their arrangement within a vertical sequence<sup>13</sup>. The interpretation of M2 of the Strelley Pool Chert as a peritidal carbonate deposit hinges upon several interrelated lines of evidence. Firstly, the observations described above preclude a non-marine interpretation. Secondly, the facies are arranged into three stacked shoaling (regressive) cycles in an overall transgressive succession, which is characteristic of peritidal carbonate sequences. Thirdly, M2 is composed entirely of facies associations that are moderately to strongly characteristic of peritidal carbonates. For example, fine scale lamination is a very

common feature of peritidal carbonates, typically with fine grainsize variations and often occurring in association with fenestral pores—both of which are observed in M2. The association of flat laminite, wrinkly laminite and fenestrae is also characteristic of peritidal carbonates, and—notably—the distribution of those facies is thought to be linked to the distribution of microbial mats in the intertidal zone. Some of the strongest indicators of a peritidal setting are features associated with local subaerial exposure, desiccation and evaporite solution. In the Strelley Pool Chert those are present in the form of desiccation cracks in flat laminite, local erosion surfaces, evaporite solution cavities and solution collapse breccias in M2. The presence of intraclast conglomerates in storm and tidal channel deposits is another characteristic feature of peritidal carbonates, as are stromatolites and other microbially mediated sediments. There are no sedimentary facies within M2 that are inconsistent with a peritidal setting. Moreover, while each of the facies may occur in other depositional environments, the association of facies as a whole and their vertical arrangement into regressive cycles in a transgressive succession is not generally associated with any other setting.

Perhaps one of the most compelling indicators of a peritidal setting is the nature of the lower contact with the underlying shoreline conglomerate. The precipitous relief of the contact suggests the boulders were ‘cemented’ in place through rapid and immediate carbonate encrustation, while the interbedding of boulders and laminated carbonate on “Anchor Ridge” demonstrates that deposition from M1 to M2 was continuous, and even locally overlapping. Penecontemporaneous deposition of M1 and M2 indicates that the environments of deposition of M1 and M2 were not far removed from one another (i.e. a deep marine setting for M2 is implausible). Finally, the three beds within M2 are not only bounded by shoreline facies at the base, but are also separated by erosional surfaces between each bed, providing further evidence that water depths in the area were never very deep. Therefore, given that a non-marine setting is excluded, it is reasonable to propose that M2 was deposited in a peritidal environment.

The factors outlined above, and the lack of syngenetic feeder veins terminating within the carbonate; the marine REE chemistry of carbonate and chert; the development

of a suite of coastal and marine facies; and the lack of a vent-centred, apron-like depositional geometry argue against interpretation of M2 as a hydrothermal exhalite<sup>5</sup>.

## **2: Stromatolite characteristics and analysis**

The defining characteristics of each of the seven stromatolite facies in the Strelley Pool Chert are listed in Supplementary Tables 1-8. Photographs and three-dimensional block diagrams of the facies are illustrated in Figure 1 in the main text. Synoptic profiles of each facies are illustrated in Supplementary Figure 16.

### **Encrusting/domical laminites**

The defining attributes of the encrusting/domical laminites are listed in Supplementary Table 1. The encrusting/domical laminites are found in bed 1 of M2 through most of the study area, including all outcrops where the basal conglomerate is present. They were therefore among the first marine sediments to be deposited on the newly-drowned landmass and shoreline deposits. Where the encrusting/domical laminites are absent, flat to irregular laminated and fenestral carbonate occur instead. The encrusting/domical laminites are syndepositional structures, as evidenced by their encrusting and infilling habit, as well as the observation that crystal splays that grew in the cusps of some developing domes were themselves subsequently encrusted.

If the encrusting/domical laminites were accreted through purely chemical precipitation, it would be difficult to explain the entrapment of grains on very steep to overhanging slopes, as observed in some well-preserved examples (Supplementary Figure 17). The grains may represent either: allochthonous grains that became entrapped in microbial mats; or rounded carbonate grains that formed *in-situ* within microbial mats. The latter process occurs in modern microbial mats and can produce scattered to abundant grains within the laminae<sup>36</sup>. If the encrusting/domical laminites formed in a purely chemical sedimentary regime, it is also difficult to explain the rapid lateral transition to contemporaneous flat/irregular-laminated and fenestral carbonate facies. In

outcrops on “North Shaw Ridge” these latter facies were deposited within a few tens of metres of encrusting/domical laminites. The rapid transition from accretionary structures to fenestral carbonate and other non-accretionary facies in a purely chemical sedimentary environment is highly unlikely, whereas localized microbially mediated accretion is plausible.

While the characteristics of the encrusting/domical laminites challenge the abiogenic hypothesis, their characteristics are plausibly explained as biogenic features comparable to known columnar stromatolite taxa. For example, *Conusella*<sup>23</sup> has convex domical/hemispherical lamina shape and forms columns in which the diameter increases upward. *Omachtenia omachtensis*<sup>37</sup> also has domical laminae and a non-branching columnar habit. A biogenic explanation is also more plausible—even probable—within the geologic context: the lateral facies association of fenestrae, flat laminite and encrusting structures is characteristic of microbially-mediated intertidal/shoreline settings<sup>13</sup>, and encrusting and dome-forming habits are typical of benthic organisms in high energy marine environments throughout the geological record<sup>38</sup>.

### **Large complex cones**

Large complex cone (LCC) stromatolites are laminated, laterally linked conical pseudocolumnar structures endemic to bed 2 of M2. They occur mainly along “Trendall Ridge”, and to a lesser extent along the northern section of “Bierf Ridge” and the southern section of “North Shaw Ridge”. Rare LCC stromatolites also occur on “Steer Ridge”. The LCC stromatolite facies includes some structures previously described from the “Trendall Locality” at the northern end of “Trendall Ridge”<sup>4</sup>. The distinguishing morphologic characteristics are outlined in Supplementary Table 2. Key morphometric data are summarised in Supplementary Table 3.

Analysis of hundreds of stromatolites in outcrop yielded 26 specimens that were exposed along their axial plane and thus suitable for morphometric analysis. Slabs cut through the axial plane are the preferred basis for accurate measurement, but are not practical to obtain in large quantities for reasons of mass and heritage considerations. Measurements in the present study were made largely on outcrops and photographs of

outcrops, and on cut slabs in a very few cases. Based on the observed characteristics, abiogenic hypotheses for syndepositional formation of the LCC structures—and counterevidence for those hypotheses—are listed in Supplementary Table 9 and discussed below.

Deformation: The LCC structures cannot have formed by post-depositional deformation processes such as tectonic folding or soft-sediment slumping, because onlapping and draping sedimentary relationships show that the laminae were already high-standing cones by the time subsequent layers were deposited (e.g. Figure 1k in main text). Early diagenetic deformation processes such as expansion and buckling of sheet cements are also implausible because the stromatolite laminae are continuous, even and show no signs of buckling or breaking. Moreover, an improbable combination of forces would be required to create identical deformation cones through scores of successive laminae. The LCC stromatolites are also not plausibly interpreted as dewatering structures because there are no central fluid release conduits or any signs of lamina disruption by escaping waters. Dewatering and sheet buckling hypotheses are also inconsistent with the fact that cones that already stood high on the seafloor (as evidenced by onlapping of conical laminae in the body of the pseudocolumns) were subsequently overlain by cones of identical laminar geometry.

Mechanical deposition: The LCC stromatolites cannot have formed by purely mechanical processes (i.e. cross-directional traction currents depositing granular sediment as ripples or dunes). Firstly, the slopes are steeper than the angle of repose for loose sediment (approximately  $30^\circ$ )<sup>39</sup>. Even if the steep slopes were stabilized by abiotic seafloor cementation<sup>17</sup>, the currents must have acted equally in all directions, creating heterogeneously spaced angular cones, ensuring deposition of thin, continuous laminae over the entire cone surface, not allowing the peaks and margins of the cones to become rounded or any of the laminae to truncate, or the axes to migrate—while depositing large expanses of flat laminated sediment in the intervening areas. Moreover, even if such unstable and unlikely conditions were to occur, their maintenance through deposition of metres of laminated sediment, stacking the cones one atop another with near-perfect inheritance, is beyond reason.

Abiotic chemical precipitation: The LCC stromatolites are difficult to explain as abiogenic chemically precipitated structures because of their highly heterogeneous spacing, the different lamina characteristics between the cones and inter-cone spaces, and particularly because of the combination of conical lamina shape and the slight but uniform thinning of the laminae on the cone slopes compared to the apices and inter-cone spaces. This latter feature leads to a parallel-sided pseudocolumnar morphology that has no abiogenic analogue and cannot be reproduced by theoretical models for abiogenic accretion<sup>8,14</sup>. (Supplementary Figure 18, 19) Although purported abiotically precipitated cones are known from the younger rock record, their morphology differs from the LCC structures in that the laminae of the abiogenic structures are isopachous, so that the cones increase in diameter and height with each successive layer and the pseudocolumn diameter increases upward<sup>8,16</sup> (Supplementary Figure 19a,c). The parallel-sided, conical pseudocolumnar morphology of the LCC structures, in contrast, is linked to the precise inheritance of cone dimensions through successive layers, and requires a slight but uniform thinning of the laminae on the cone slopes by an exact amount that ensures the vertical depth of the laminae is consistent throughout (Supplementary Figure 19b, d). Any other geometry of the laminae results in distortion of the cones with each successive layer. The LCC morphology lacks a naturally-occurring abiological analogue. Moreover, although some of the individual traits of the LCC structures might be explained by various abiotic hypotheses, the combined characteristics require a theoretical permutation of abiotic processes that is unlikely to occur naturally, and even less likely to remain stable for sufficiently long periods of time to create the tall conical pseudocolumnar structures observed in the Strelley Pool Chert. In contrast, the LCC characteristics are entirely consistent with the biogenic hypothesis. In fact, the particular characteristics and geometry of the LCC structures necessitates a spatially selective sedimentary process and preferential vertical component to accretion that are best attributed to the influence of vertically motile benthic microbial communities, such as those associated with conical columnar stromatolites in Yellowstone National Park today<sup>17</sup>. Moreover, similar vertically inherited conical pseudocolumnar morphology is exhibited by stromatolites of widely accepted biogenicity in the younger rock record, including *Conophyton*<sup>21</sup> and associated taxa. While a much more detailed study would be required to determine



whether *bona fide* examples of *Conophyton* occur in the Strelley Pool Chert, there are several morphological similarities between *Conophyton* and the LCC structures that suggest their formation was influenced by similar processes, particularly biological processes.

### **Egg carton laminites**

The defining attributes of the egg carton laminites are listed in Supplementary Table 4. Egg carton laminites coexist with the LCC structures in M2-bed 2 in the central parts of the study area (“Trendall Ridge” and southern “North Shaw Ridge”). Although the egg carton structures are similar to some of the smaller structures from the LCC facies, the egg carton laminites are distinguished from the LCC structures by their: 1) typically smaller size (synoptic relief ~1-3 cm); 2) occurrence in contiguous, laterally linked ‘runs’ of similar-sized structures, in some instances collectively mounding upward in bioherm-like geometry; and 3) lower height of the pseudocolumns (~ 3cm) – falling well short of the decimetre to metre-scale heights of the LCC structures. The similar size and spacing of the cones in each series gives them the appearance of an egg carton. Some asymmetric examples occur on palaeoslopes near asymmetric LCC structures. The conical shape of the egg carton laminites argues against abiotic precipitation for similar reasons to the LCC facies. Like the LCC structures, the conical pseudocolumnar morphology of the egg carton laminites is difficult to explain through purely abiogenic processes, and is a feature exhibited by coniform stromatolites of widely accepted biogenicity, such as *Conophyton*<sup>21</sup>.

### **Cusate Swales**

The defining attributes of the cusate swales are listed in Supplementary Table 5. Cusate swales occur on “Steer Ridge”, “Anchor Ridge” and the northern end of “North Shaw Ridge”, in the lower to middle parts of bed 2.

One particularly telling observation about the origin of the cusate swales occurs in a bedding plane outcrop where a number of large (8-10 centimetre-high) cones with arcuate bulges on their sides occur on the flanks of one of the cusate swale structures

(Supplementary Figure 21). The large cones are spaced along the ridges and in the troughs alongside some clusters of smaller closely spaced cones. Every large cone on the surface has a semicircular bulge around its base on the northern side. The appearance and uniform vergence of the bulges suggests they were formed by soft-sediment flexure of the laminae during downhill slumping, as illustrated in Supplementary Figure 21. That observation is significant because one of the few attributes distinguishing microbial mats from crystalline crusts is their flexibility. The presence of slump-like bulges suggests the structures had flexible, microbially-bound laminae rather than rigid crystalline laminae. The bulges cannot have formed by preferential accretion on one side of the cones due to some unidirectional environmental process such as currents, as the small cones on the same surface do not show any preferential build-up. The smaller cones probably lacked sufficient mass to cause lamina flexure during downhill movement.

The three-dimensional mesostructure of the cusped swales is similar to the Proterozoic stromatolite *Thesaurus pyramoides*<sup>25</sup>. *Thesaurus* has slightly steeper slopes and marginally closer ridge spacing (~20-40 cm) than the cusped swales, but demonstrates microbially-influenced development of the complex ridge-cusp-cone geometry of the cusped swales. Some variants of *Siren pyelodes*<sup>25</sup> also have similar mesoscopic features to the cusped swales, notably including small adorning cones at the crests, which are remarkably similar to the cones that adorn the crests of the cusped swales.

In contrast, no abiologic analogues are known for the cusped swales. To form the cusped swales by mechanical sediment deposition would require simultaneously: 1) a highly unusual combination of equal-strength currents approaching from 360° to create the adorning conical bedforms; 2) localisation of the current energy to produce adorning cones only at the crests of the structures; 3) a different, more energetic and highly unusual current regime to produce the network of large, sharp-crested ridges with concave-sided pseudo-conical intersections; and 4) some localized mineral precipitation process to produce the centimetre-sized evaporite crystals on the crests of some structures (See Figure 1g, h in the main text). The maintenance of such a precise balance over a large area for a long period of time (throughout deposition of metres of finely laminated sediment) coupled with the inferred flexible laminae described in the main article—is

extraordinarily difficult to explain in any kind of abiotic sedimentary regime. Thus, while no single feature or line of evidence within the structures may indicate a biological origin<sup>40</sup>, the association of features is difficult to reconcile with any other hypothesis.

### **Small crested/conical laminites**

The defining attributes of small crested/conical laminites are listed in Supplementary Table 6. Small crested/conical laminites are characteristically found in the upper parts of M2 / bed 2 of the northern study area. They formed in the latter stages of the regressive cycle and mark a transition from larger cusped swale stromatolites in the lower part of the bed. The structures are also found laterally intercalated with flat laminite locally in the upper parts of M2 bed 1.

The wavy to wrinkly, locally conical or bumpy morphology of the small crested/conical laminites alone does not preclude an abiological origin. However, such lamina shapes (especially wrinkly laminae) are characteristic of microbialites in a variety of subaqueous environments throughout the geologic record (e.g. *Cyathotes phorbadicia*<sup>25</sup>). In peritidal carbonate settings the distribution of wrinkly laminites among flat laminated and fenestral carbonate is closely linked to the distribution of microbial mats<sup>13</sup>.

### **Wavy laminite**

The defining attributes of the wavy laminites are listed in Supplementary Table 7. The wavy laminites are ubiquitous throughout bed 3 of M2. In many instances the wavy laminites would be difficult to distinguish from abiogenic sedimentary structures such as climbing ripples, particularly in profile view. However, the slopes are commonly steeper than the angle of repose<sup>13</sup>, the peaks are typically too angular for ripples, and most of the structures have a sub-conical lamina shape. While those characteristics may pose challenges to the abiogenic hypothesis, they are characteristics displayed by accepted biogenic structures in younger rocks. A stromatolite bearing close resemblance is *Irregularia*<sup>23</sup>, a stratiform stromatolite that occurs in biostromes of similar dimension and geometry to bed 3 of M2. *Irregularia*—like the wavy laminites, and unlike purely

mechanically-deposited structures such as ripples—has irregular undulating laminae, erect to inclined axes, highly variable lamina shape and slopes that are commonly steeper than the angle of repose for loose sediment. The wavy laminites of the Strelley Pool Chert also bear comparison with microbially-bound current and wave ripples, which are known from modern and ancient environments.

### **Iron-rich laminite**

The iron-rich laminites are thin, distinct, laterally continuous layers of laminated ironstone within M3. Their defining attributes are summarised in Supplementary Table 8. The 0.5-2.0 centimetre-thick iron-rich layers consist of bundled ironstone laminae with flat, wavy, bumpy, wrinkled and hemispherical lamina morphology. They occur at irregular stratigraphic intervals through the member and comprise about 5-15% of the rock. In some instances the lamina shape is inherited from an underlying topographic feature such as a pebbly conglomerate layer or a splay of silicified evaporite crystals. However, in most instances the lamina relief is not inherited from any visible template.

The concentration of elements such as iron in laminae is commonly attributed to microbial metabolism<sup>13</sup>. Iron-rich crusts of possible abiotic origin form at transgressive submarine hardgrounds due to extremely low sediment influx. However, that interpretation is inconsistent with the presence of pebble conglomerates (many of which have channel infill geometry) through M3.

## **3: Rare earth element chemistry**

### **Methods**

A suite of carbonate and chert samples from the Strelley Pool Chert were analysed for REE abundances. The analysed samples were collected from “North Shaw Ridge” and encompass: sedimentary black cherts from immediately beneath the basal unconformity (AA13); black chert from clasts in M1 conglomerate (AA18); bedded chert from the

black and white banded chert in M3 (AA3); bedded black chert in M4 (AA7); and carbonate (AA1) and chert (AA2) from “large complex cone” facies laminae (bed 2 of M2). REE abundances of one carbonate sample from the Strelley Pool Chert were previously reported<sup>6</sup> but in that study, no attempt was made to analyse the co-existing chert. Here we present separate data for chert and carbonate from mm-scale stromatolitic laminae because both are present in laminated clasts in the overlying conglomerate, indicating that both carbonate and chert are primary or early sedimentary components.

The carbonate-chert sample has relatively continuous, millimeter-scale intercalated couplets of carbonate and chert that cannot be physically separated to complete purity. Milligram-sized samples of carbonate and chert (two each) were handpicked from individual laminae on the flank of the structure. The carbonate fraction was dissolved with 2% double-sub-boiling distilled nitric acid. After complete carbonate digestion, the remaining chert was dissolved with ultra-clean hydrofluoric acid. Similar sized samples were handpicked from primary sedimentary layers in the chert specimens, which lack coexisting carbonate. These were digested with ultra-clean hydrofluoric acid at 130°C in 23mL Teflon beakers. The chert solutions (from >250mg) were dried down at 110°C to drive off Si as the tetrafluoride. This yielded ~ 5mg solid residue that was converted twice with nitric acid and eventually dissolved in 2% HNO<sub>3</sub>. Solutions were then spiked with internal standards. For the chert samples, the great reduction in dissolved solid (by SiF<sub>4</sub> loss) yielded very low true detection limits (parts per trillion) with a new generation inductively-coupled-plasma mass spectrometer (Thermo Electron X Series)<sup>41</sup>. REE data were normalised to a modern alluvial sediment composite (MuQ) that was analysed using an internally consistent procedure<sup>42</sup>.

## **Results and discussion**

Results of the (REE) analyses are presented in Supplementary Figure 22. The first feature to notice is that chert and accompanying carbonate in the stromatolitic sample have REE patterns of near identical shape. Absolute concentrations in the chert are approximately 250 times lower than in the carbonate, but due to the excellent detection limits, the data are of comparable quality (typical 1 sigma errors of less than 2%). The shale-normalised

patterns displayed by chert and carbonate in stromatolitic laminae show the essential combination of features typical of Archaean seawater<sup>43</sup>: 1) LREE element depletion (Pr/Yb of  $\ll 1$ ); 2) strongly superchondritic (Y/Ho ratio  $>30$ ); 3) a positive La anomaly (when considered relative to a projection from Nd and Pr); and 4) a positive Gd anomaly (relative to Dy and Sm, instead of Eu, which is itself variable). The combination of those features, rather than the occurrence of any single feature, is characteristic of well-established Archaean hydrogenous marine sediments (i.e. sediments formed from dissolved components in Archaean seawater)<sup>43,44</sup>. The preservation of those features in both phases of the studied stromatolitic laminae identifies them as true marine hydrogenous sediments that formed in seawater rather than precipitation from hydrothermal fluids, like those circulating through hot ocean floor rocks.

Of the remaining cherts analysed, only one sample—a sedimentary black chert (AA3) from M3—has comparable REE chemistry and can therefore be considered a marine precipitate. By contrast, the three other cherts show different patterns, with subchondritic Y/Ho ratios, and insignificant La and Gd anomalies. They show quite strong positive Eu anomalies. The similarity of REE signatures in the underlying bedded black chert and the black chert clast from M1 supports the interpretation that the conglomerate was derived from erosion of the underlying strata. These features are fully consistent with hydrothermal fluids but it is not possible to ascertain from what type of hydrothermal fluid they might have precipitated.

In summary, the carbonate REE pattern is similar to the pattern for Strelley Pool Chert carbonates presented previously<sup>6</sup>, where it was concluded that the carbonate formed in a marine environment. The data presented here support that interpretation and further indicate that the chert also formed from dissolved seawater components. The carbonate has evidently preserved its REE integrity despite neomorphism either by dolomitization of a primary calcium carbonate or simple recrystallization of primary dolomite. Trace REE coherence in dolomitized carbonates has been widely documented<sup>45</sup> and is a result of the relative immobility of this group of elements in carbonates. Finally, the contrast of seawater-derived stromatolitic chert with non-seawater REE patterns of overlying and underlying black cherts also supports the preservation of different primary

depositional REE signatures in stratigraphically distinct laminae, beds and members. The preservation of primary signatures is further supported by concomitant facies-dependant changes in the thermal maturity of carbonaceous materials in the Strelley Pool Chert. The thermal maturity patterns of the carbonaceous materials reflect changes from warmer hydrothermal conditions in the underlying black chert (preserved in M1 chert clasts), to cooler marine conditions in M2, and resumed hydrothermal conditions in the black cherts of M4<sup>46</sup>.

## Supplementary References

28. Mayer, R. *Paleoalterites and Paleosols* (A.A. Balkema, Rotterdam, 1997)
29. Knight, J. Processes of soft-sediment clast formation in the intertidal zone *Sed. Geol.* **181** 207-214 (2005)
30. Johnson, M.E. Studies on ancient rocky shores: A brief history and annotated bibliography *J. Coast. Res.* **8** 797-812 (1992)
31. Oak, H.L. The boulder beach: A fundamentally distinct sedimentary assemblage *Ann. Assoc. Amer. Geog.* **74** 71-82 (1984)
32. Felton, E.A. Sedimentology of rocky shorelines: 1: A review of the problem, with analytical methods, and insights gained from the Hulopoe Gravel and the modern rocky shoreline of Lanai, Hawaii *Sed. Geol.* **152** 221-245 (2002)
33. Trenhaile, A.S. Rock coasts, with particular emphasis on shore platforms. *Geomorph.* **48** 7-22 (2002)
34. Noormets, R., Felton, E.A., Crook, K.A.W. Sedimentology of rocky shorelines: 2 Shoreline megaclasts on the north shore of Oahu, Hawaii—origins and history *Sed. Geol.* **150** 31-55 (2002)

35. Hoffman, P., in *Stromatolites* (ed Walter, M.R.) 261-271 (Developments in Sedimentology, **20**, 1976)
36. Kropp, J., Bloh, W., von, Klenke, Th. Calcite formation in microbial mats: modeling and quantification of inhomogeneous distribution patterns by cellular automation model and multifractal measures. *Geol. Rundschau* **85** 857-863 (1996)
37. Walter, M.R., Krylov, I.N., Muir, M.D. Stromatolites from Middle and Later Proterozoic sequences in the McArthur and Georgina Basins and Mount Isa Province, Australia. *Alcheringa* **12** 79-106 (1988)
38. Johnson, M.E., Baarlie, B.G. Diversification of rocky shore biotas through geologic time *Geobios* **32** 257-273 (1998)
39. Bagnold, R.A. The flow of cohesionless grains in fluids *Royal Soc. London Philos. Trans. Ser. A* **249** 235-297 (1956)
40. Awramik, S.M., Grey, K. Stromatolites: Biogenicity, biosignatures, and bioconfusion. *Proc. SPIE* **5906** 1-9 (2005)
41. Kamber, B.S., Grieg, A., Schönberg, R., Collerson, K.D. A refined solution to Earth's hidden niobium: Implications for evolution of continental crust and depth of core formation. *Precambrian Res.* **126** 289-308 (2003)
42. Kamber, B. S., Greig, A., Collerson, K. D., A new estimate for the composition of weathered young upper continental crust from alluvial sediments, Queensland, Australia *Geochim. Cosmochim. Acta* **69** 1041-1058 (2005)
43. Bolhar, R., Kamber, B.S., Moorbath, S., Fedo C.M., and Whitehouse, M.J. The characterisation of early Archaean chemical sediments by trace element signatures. *Earth Plan. Sci. Letters* **222** 43-60 (2004).
44. Bau, M. and Möller, P. Rare earth element systematics of the chemically precipitated component in Early Precambrian iron formations and the evolution of



the terrestrial atmosphere-hydrosphere-lithosphere system. *Geochim. Cosmochim. Acta* **57** 2239-2249 (1993).

45. Banner, J.L., Hanson, G.N. and Meyers, W.J. Rare earth element and Nd isotopic variations in regionally extensive dolomites from the Burlington-Keokuk Formation (Mississippian): Implications for REE mobility during carbonate diagenesis. *J. Sed. Petrology* **58** 415-432 (1988).
46. Allwood, A.C., Walter, M.R., and Marshall, C.P. Raman spectroscopy reveals thermal palaeoenvironments of c.3.5 billion-year-old organic matter. *J. Vib. Spec.* (in press).
