# Supplementary material for: Stromatolite reef from the Early Archaean era of Australia
Source: Springer Nature journal article supplement (doi:10.1038/nature04764), 2006-06-01
Supplement: 41586_2006_BFnature04764_MOESM2_ESM.pdf [file 41586_2006_BFnature04764_MOESM2_ESM.pdf]

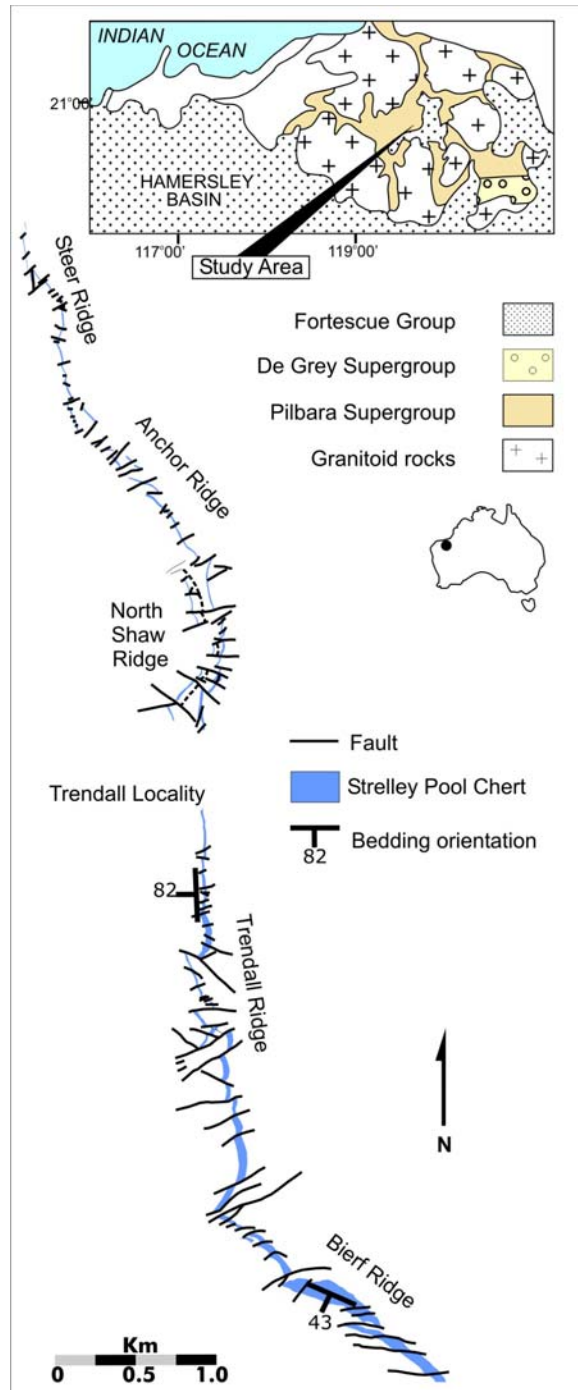

**Supplementary Figure 1:** Map of Strelley Pool Chert outcrop in the study area on the southwest flank of the North Pole Dome. Insert at top: structural elements of the northern Pilbara Craton, showing location of the study area. Inset modified from a map provided by M. Van Kranendonk.

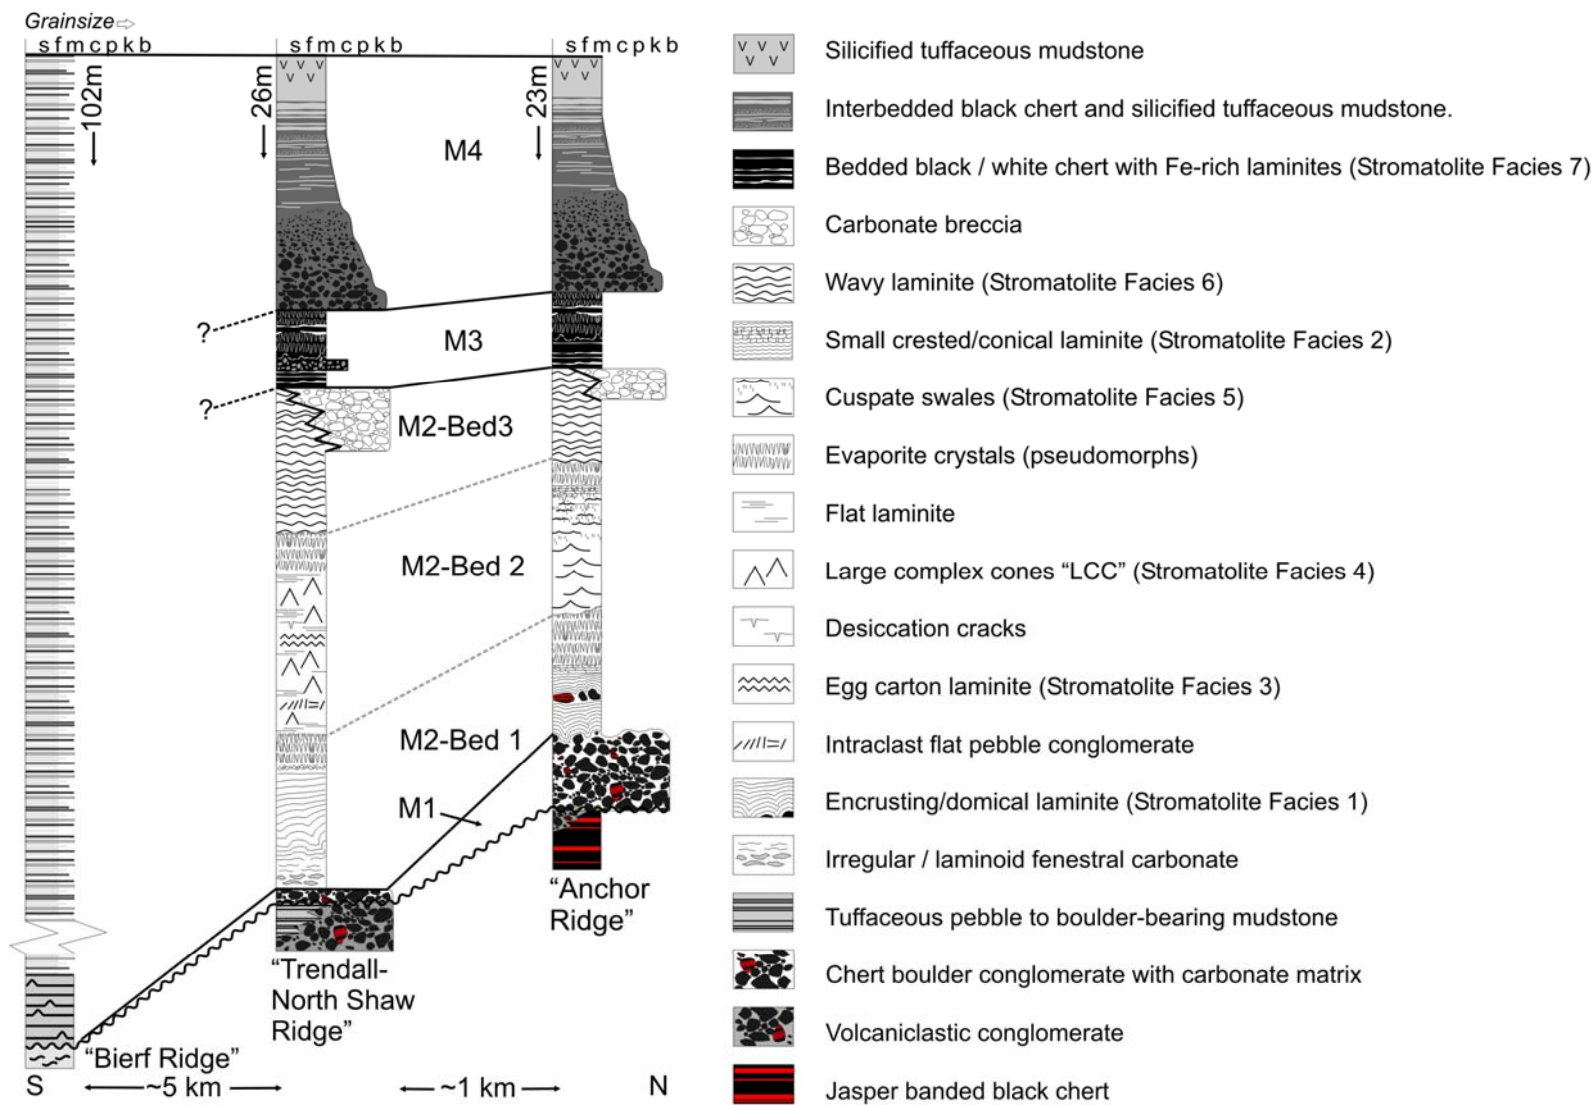

**Supplementary Figure 2:** Correlation of stratigraphic columns representing the southern, central and northern study area. Grainsize scale: s = silt-sand, f = fine sand, m = medium sand, c = coarse sand, p = pebble, k = cobble, b = boulder.

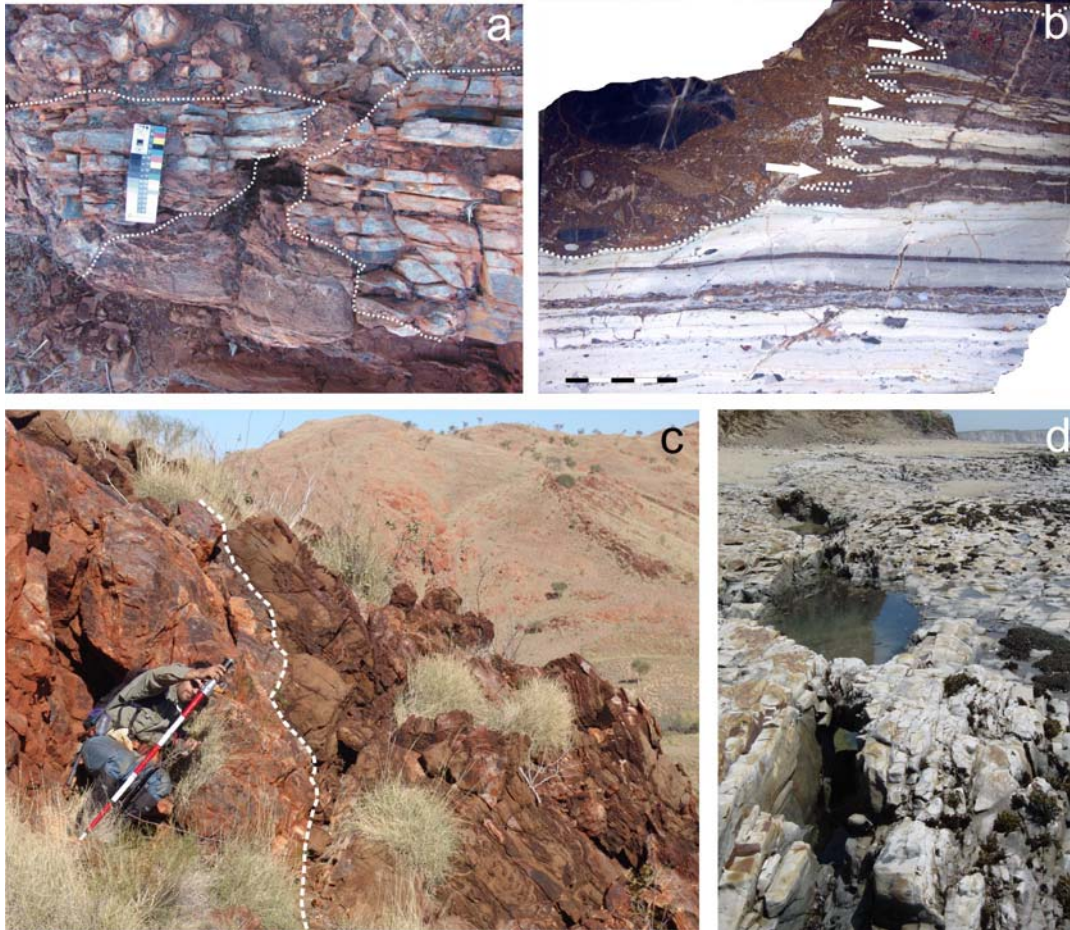

**Supplementary Figure 3:** (A-C) Erosional features at the base of the Strelley Pool Chert: White dotted lines mark the base of member 1. (A) Outcrop showing cross section view of a fissure leading down to a small cavity in the tuffaceous mudstone substrate beneath member 1. The majority of clasts in the overlying conglomerate are tuffaceous mudstone: compare with Supplementary Figures 4 and 6, where conglomerate containing dominantly jasper-banded chert boulders overlies a jasper-banded chert substrate. Scale card is 18 cm long. (B) Cut slab showing a portion of a pothole scour (top left quarter of slab) and carbonate infill along parted bedding planes in the pale mudstone substrate (white arrows). Scale increments = 1cm. (C) Cross section outcrop of jasper-banded black chert palaeo cliff (sea cliff), overlain by carbonate (member 2 / bed 1). Bedding dips steeply to the right of the picture: angle of stadia rod shows palaeovertical direction. Rock type to the left of dotted line is chert, to the right is carbonate (M2). Boulders of M1 conglomerate rest on the platform on the stratigraphically higher side of the palaeocliff about 20 m along strike. Stadia increments = 20 cm. (D) Erosional potholes and fissures in mudstone—similar to features shown in A and B—formed in the intertidal zone on a wave cut platform on the modern California coast. Pothole is ~60 cm across (Photo by A. Allwood).



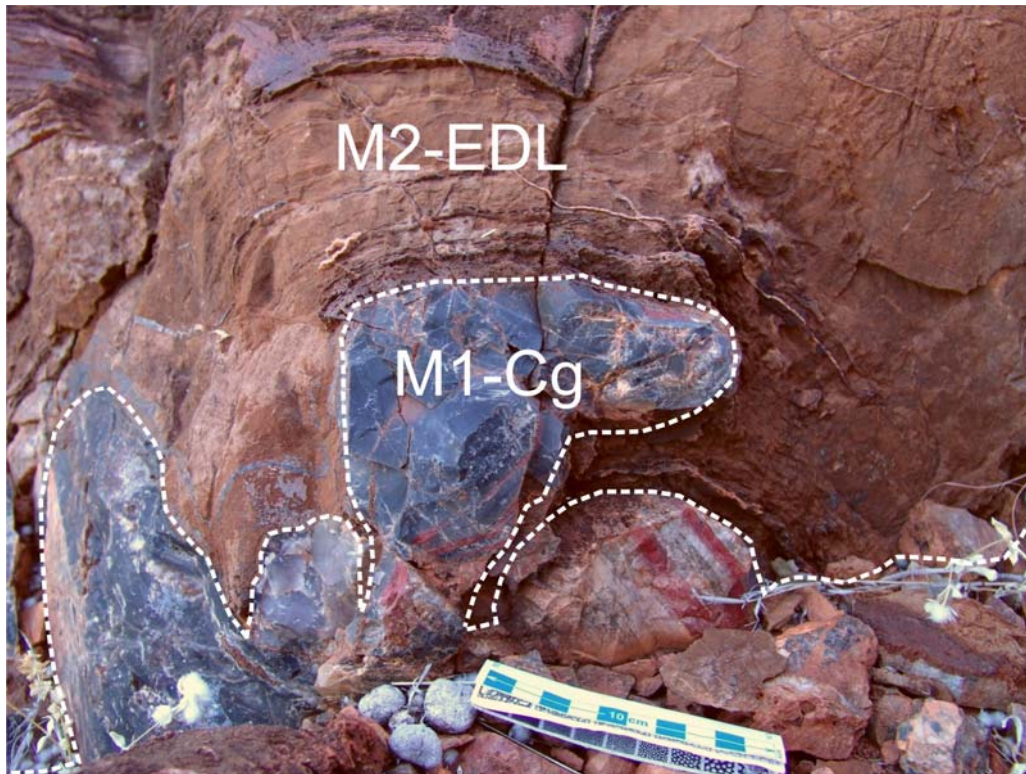

**Supplementary Figure 4:** Contact between member 1 chert boulder conglomerate (M1-Cg: lower section) and encrusting/domical laminites of M2 (M2-EDL: brown rock in upper section). The laminated carbonate encrusted precariously perched boulders, so that the contact (dotted white line) has extremely sharp, sinuous, even locally overhanging relief.



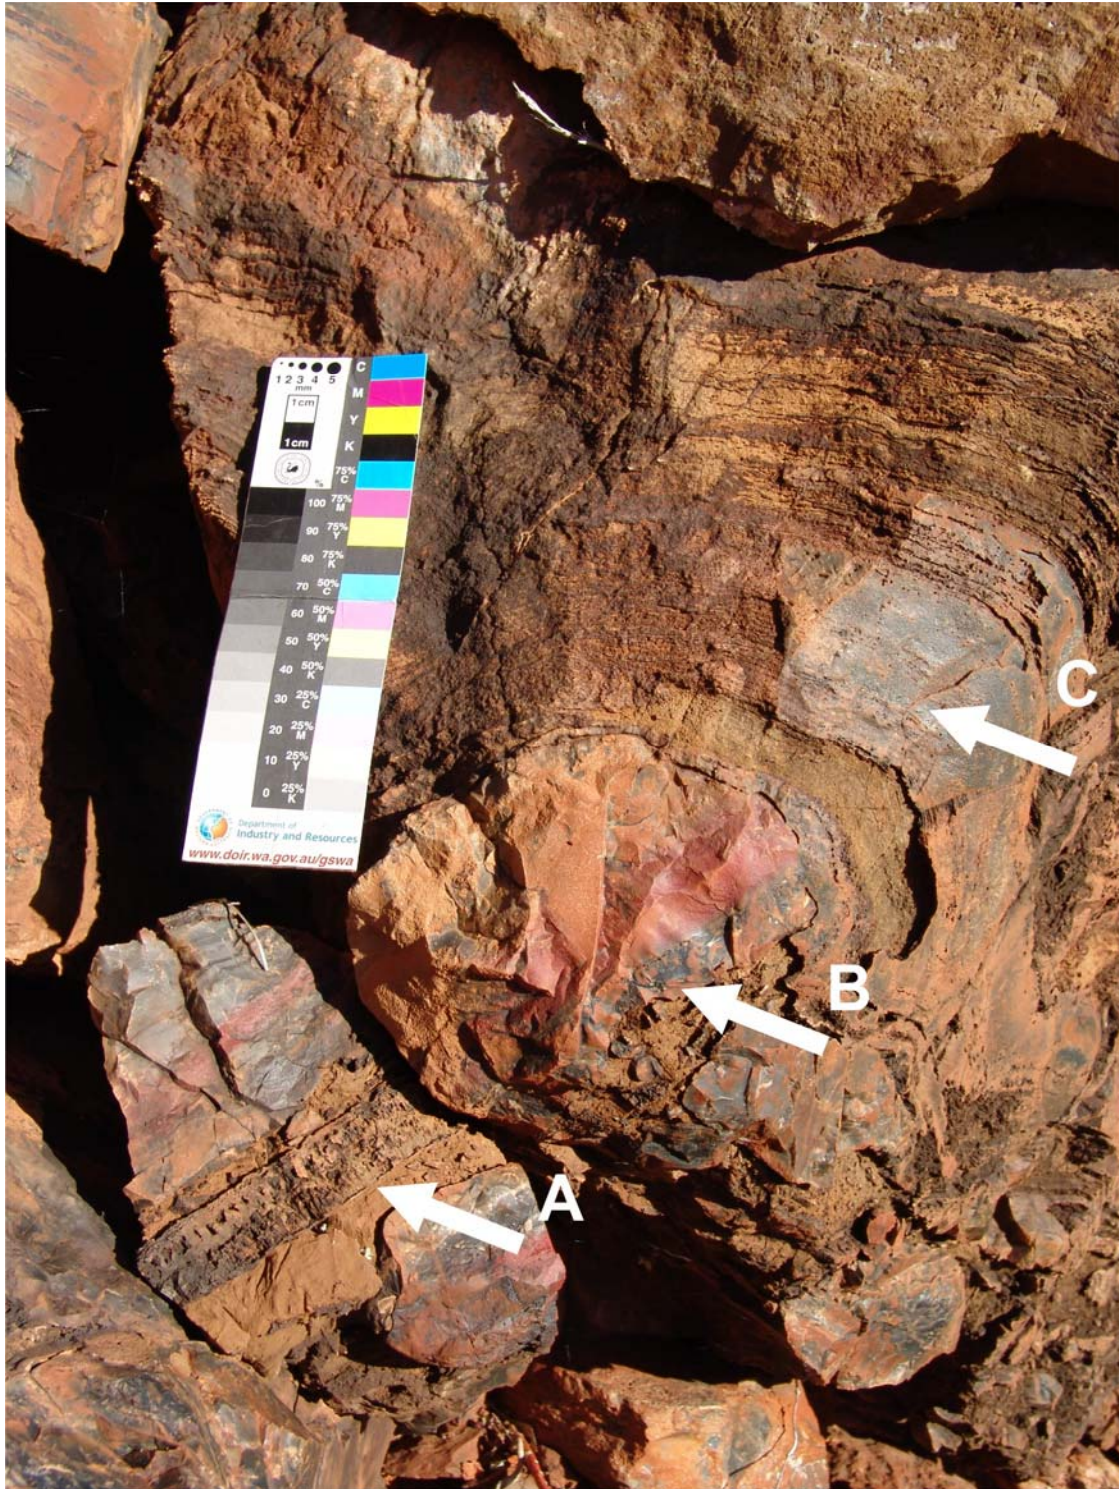

**Supplementary Figure 5:** Outcrop showing flat cobble carbonate intraclast (arrow A) among chert boulders (arrow B) in M1. The boulders, including the carbonate clast, are encrusted by “encrusting/domical laminites” (arrow C) at the base of M2. Scale increments = 1 cm.



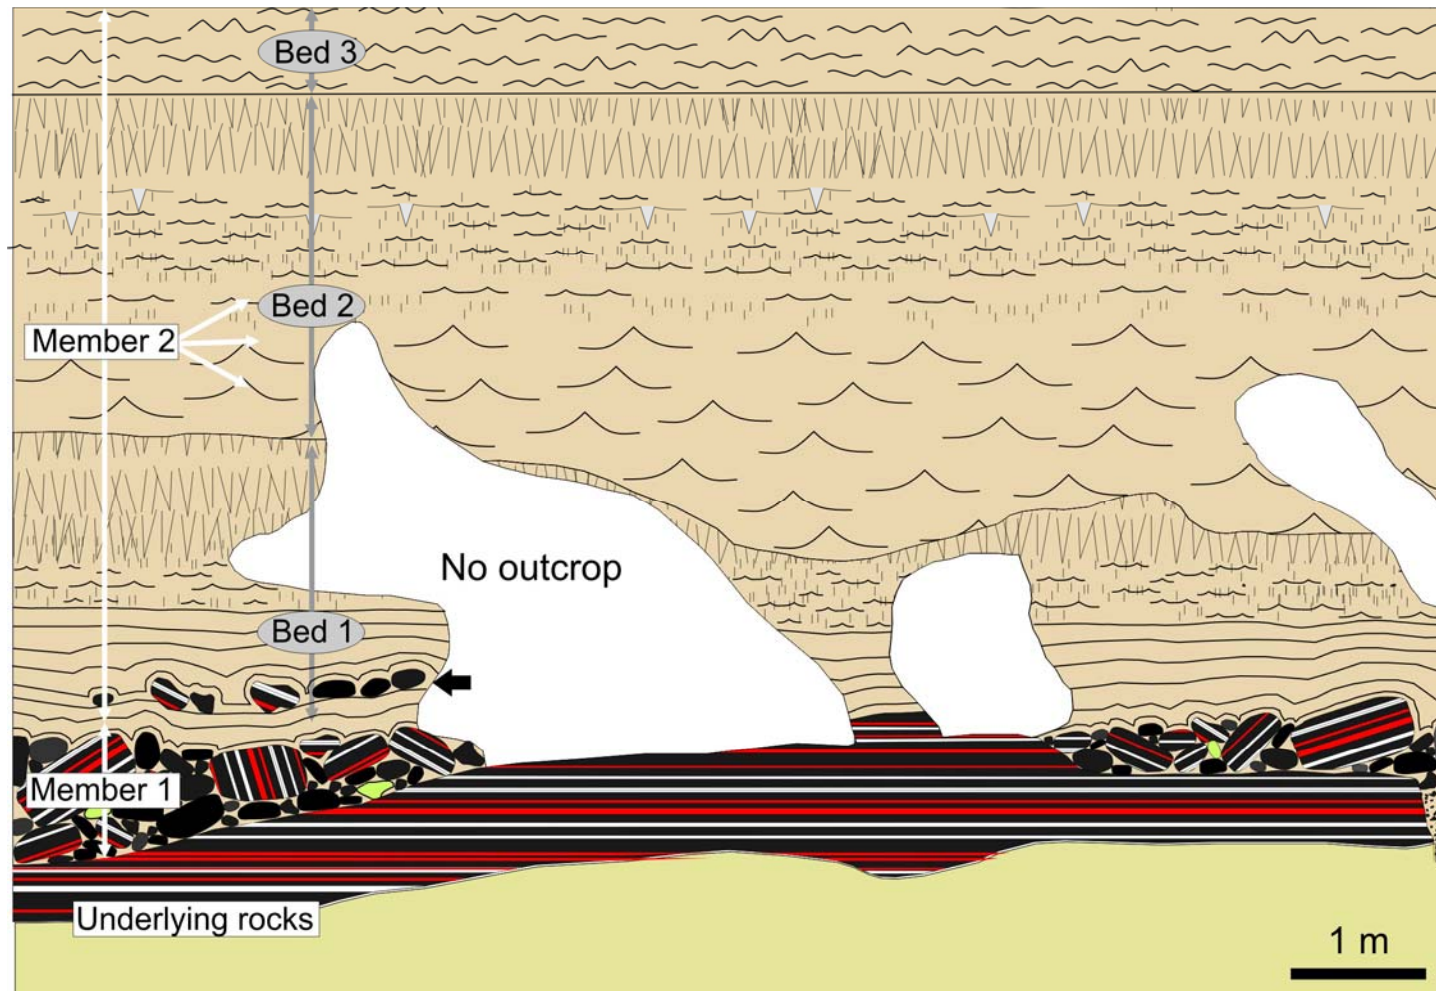

**Supplementary Figure 6:** Map of outcrop at “Anchor Ridge” showing M1 and M2 of the Strelley Pool Chert. See key in Supplementary Figure 2 for explanation of schematic fill symbols. M1 onlaps relict topography of the underlying jasper-banded black chert. A second, discrete layer of chert boulders occurs ~80 cm above the main conglomerate (black arrow). Note the layer of evaporite crystal pseudomorphs at the top of bed 1 and 2 of M2. The upper surface of the crystal layer in bed 1 is eroded. Scale bar shows vertical and horizontal scale.

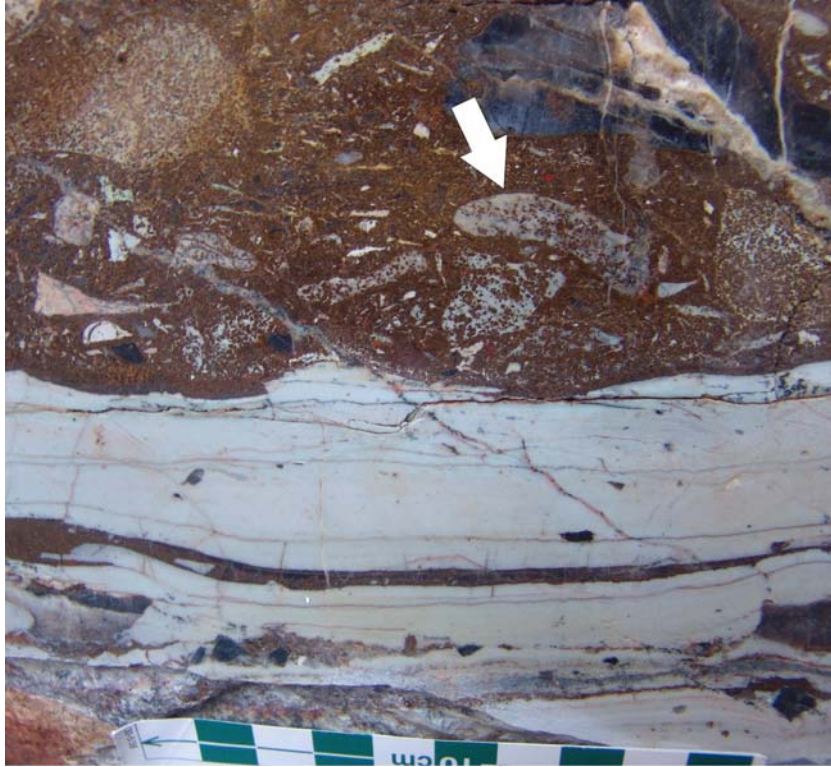

**Supplementary Figure 7:** Cut slab (cross section detail view) showing soft mud intraclasts (example at tip of arrow) above erosional contact at base of M1. The underlying rock (pale grey-green bedded unit in lower half of slab) is pebbly tuffaceous mudstone. Upper half of slab is M1 chert/mudstone pebble conglomerate with brown carbonate matrix. Contact between the two is the basal contact of the Strelley Pool Chert. Mudstone clasts have been partially replaced by carbonate.

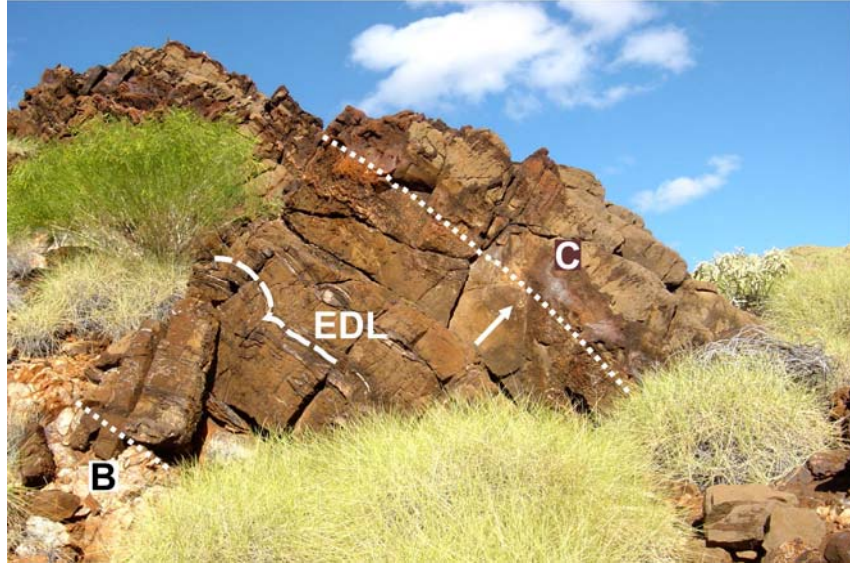

**Supplementary Figure 8:** Outcrop showing bed 1 of M2 of the Strelley Pool Chert (brown rock) directly overlying altered basalt, or palaeoalterite (B). Lower dotted white line shows basal contact of the carbonate. Bedding dips steeply to the right: arrow indicates stratigraphic up direction. The lower part of bed 1 contains encrusting/domical laminites “EDL”, which have a cusped dome shape shown with long dashed white line. The upper part of bed 1 (above upper dotted white line) consists of a layer of evaporite crystal pseudomorphs (C). Stratigraphic thickness between the dotted lines is approximately 1.7 meters.



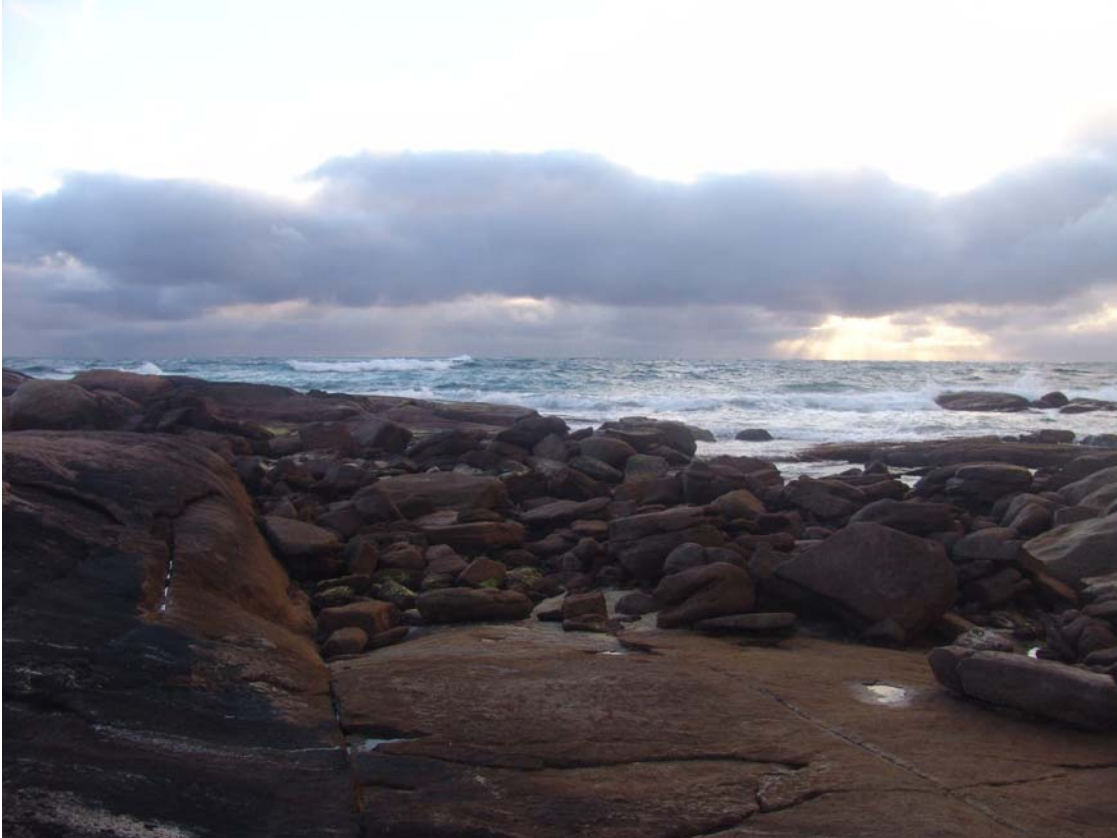

**Supplementary Figure 9:** The rocky shore and wave cut platform at Cape Leeuwin, Western Australia, which provides a modern analogue for M1 of the Strelley Pool Chert. At Cape Leeuwin, the conglomerate boulders are derived from the underlying granulite and constitute virtually 100% of the sediment deposited on the platform. The boulders are scattered or clustered in small groups across the platform. Topographic relief along the shoreline is low (metre-scale) and there is no cliff or steep slope behind the wave-cut platform. The boulders are derived from *in situ* erosion of the platform and possibly a submerged seaward edge. (Photo by A. Allwood).

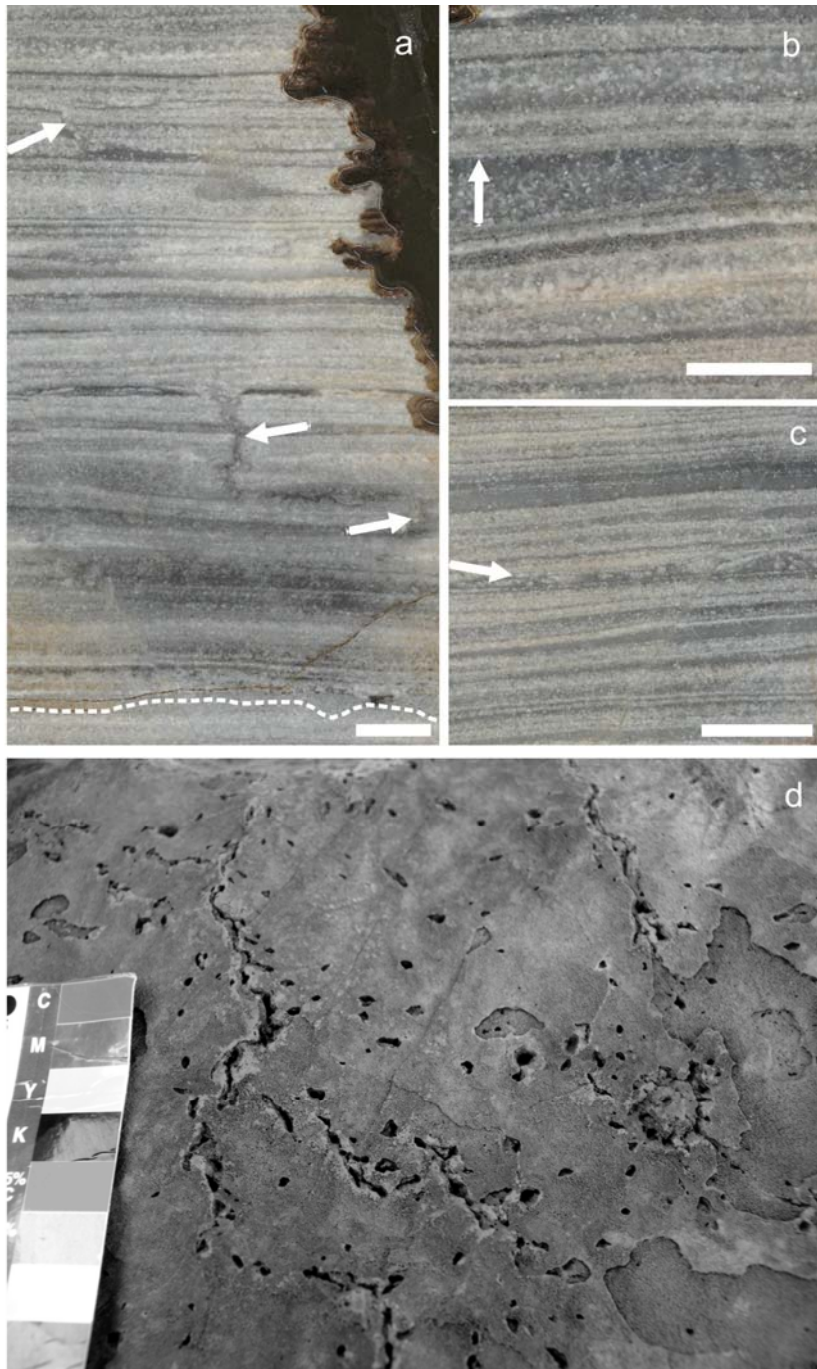

**Supplementary Figure 10:** Fabrics in flat laminite facies. (A) Cut slab of flat laminite with desiccation cracks (arrows) and erosion surface with microconglomerate lag (above dotted line). (B) Flat laminite showing graded lamination (arrow) and subtle grainsize variations between laminae. (C) Flat laminite with microconglomerate layer (arrow) and fine grainsize variations. (D) Bedding plane outcrop exposure with cracks possibly formed by desiccation or gas-release from beneath a cohesive layer. The millimetre-sized holes represent weathered-out evaporite crystal pseudomorphs. Scale bars in A-C = 1 cm. Scale card increments in D = 1 cm.

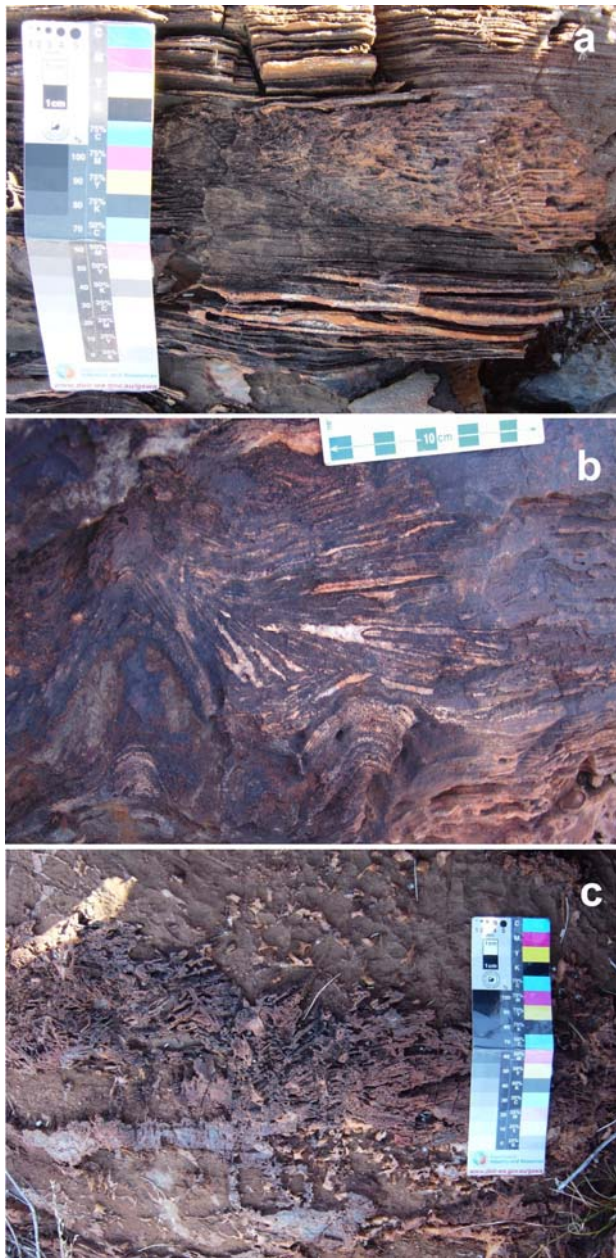

**Supplementary Figure 11:** Carbonate flat pebble intraclast conglomerates (A) in flat laminite of M2 bed 2, Trendall area; (B) between stromatolitic structures of M2 bed 2, Trendall area; (C) in fenestral carbonate of M2 bed 1, “Anchor Ridge”. Scale card increments = 1 cm.



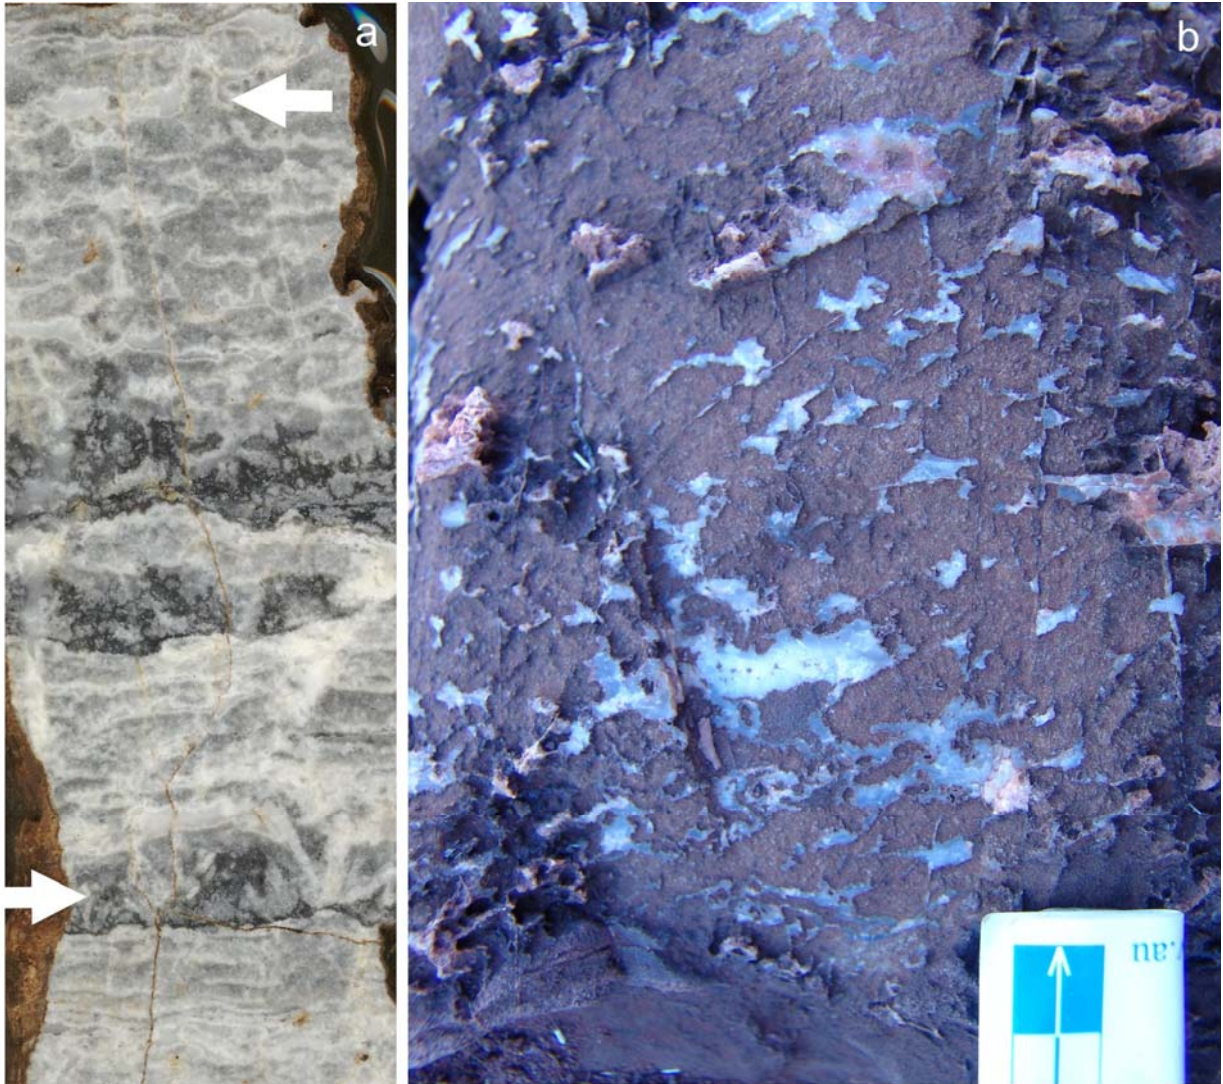

**Supplementary Figure 12:** Fenestrae in carbonate from bed 1 of M2. (A) Cut slab of sample approximately 80 cm above the lower contact of the bed, showing laminoid fenestrae (upper arrow) and relict crystal fans (lower arrow). (B) Irregular fenestrae in outcrop.

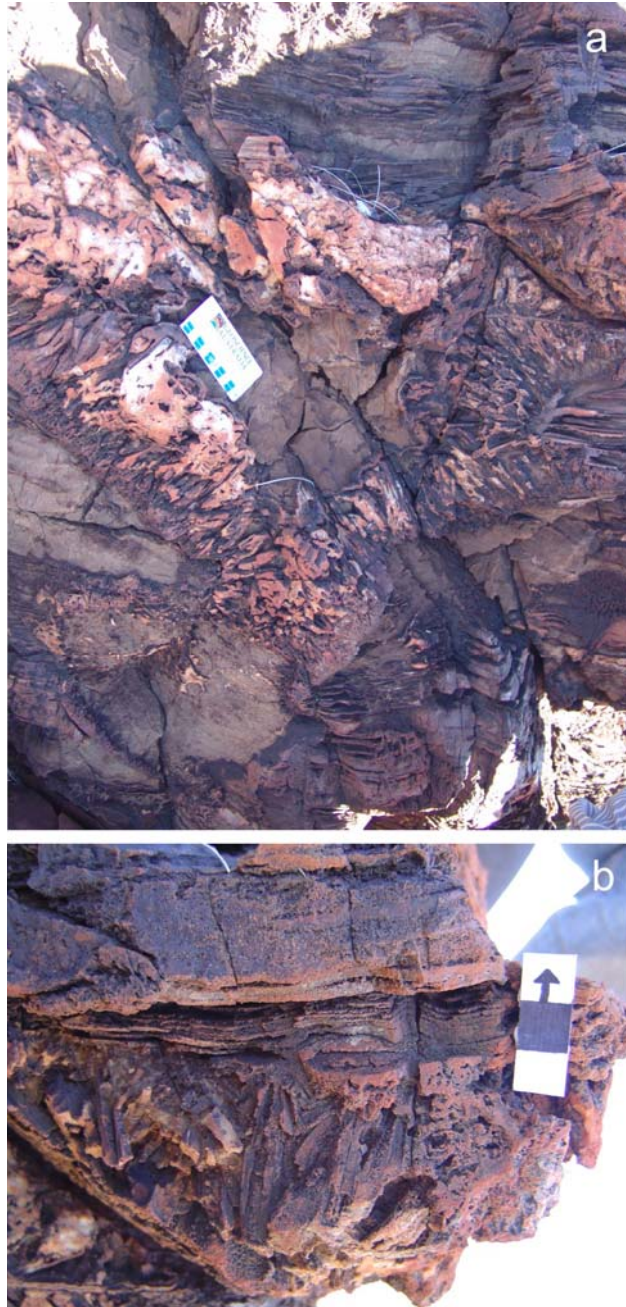

**Supplementary Figure 13:** Solution cavities in M2. (A) V-shaped cavity lined with crystals. Overlying laminae drape and infill the depression above the cavity. (B) Crystals radiating downward from the roof of a cavity in bed 2 of M2. Scale card increments = 1 cm, arrow shows stratigraphic up.

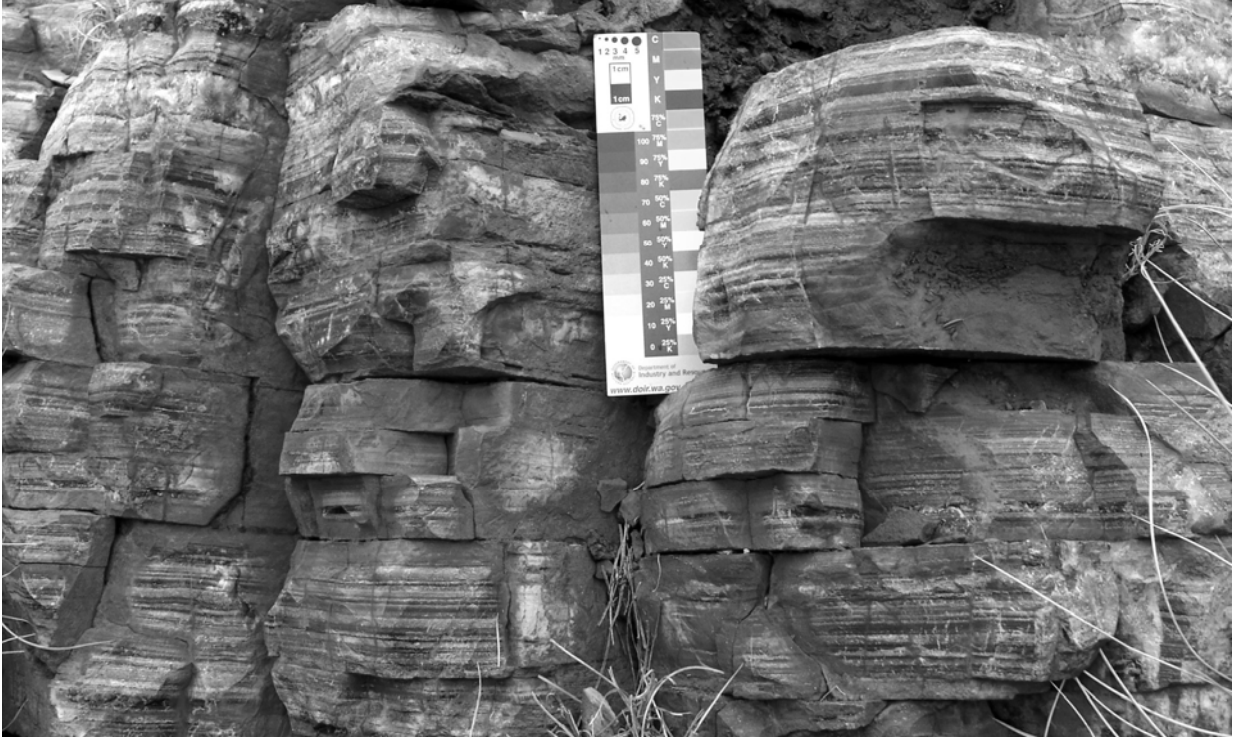

**Supplementary Figure 14:** Finely laminated silty chert in the far southern study area, interpreted as silicified sediments deposited below wave base on the platform slope. Scale card = 20 cm.



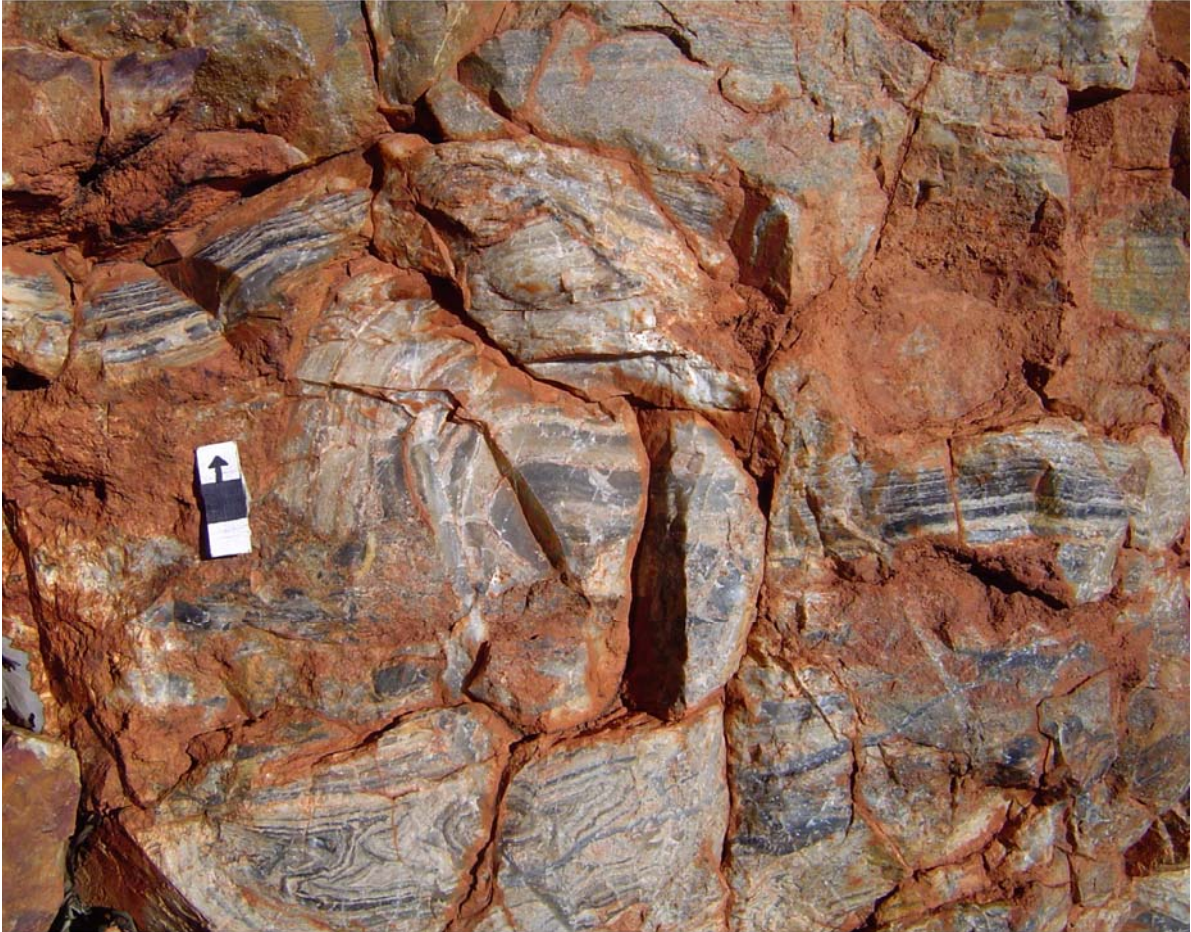

**Supplementary Figure 15:** Convolute lamination in the southern equivalent of M2 (on “Bierf Ridge”). The laminae in the centre of the image form a left (approximately south)-verging recumbent fold, formed by down-slope slumping of the sediment layer prior to full lithification. Scale increments = 1 cm.

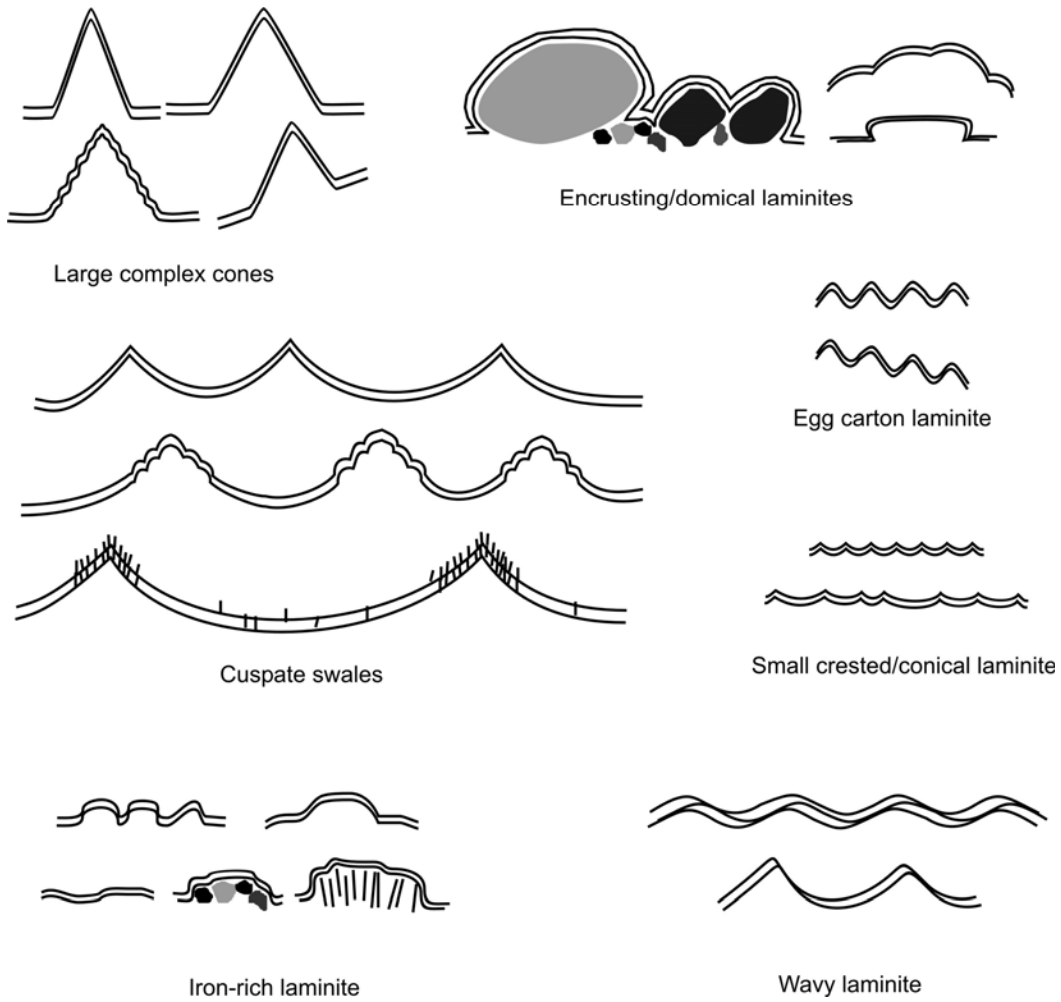

**Supplementary Figure 16:** Typical synoptic profiles of the seven stromatolite facies of the Strelley Pool Chert. Scales vary: see text, Supplementary Tables 1-8 and Figure 2 of main article for example of scales at which each facies occurs.

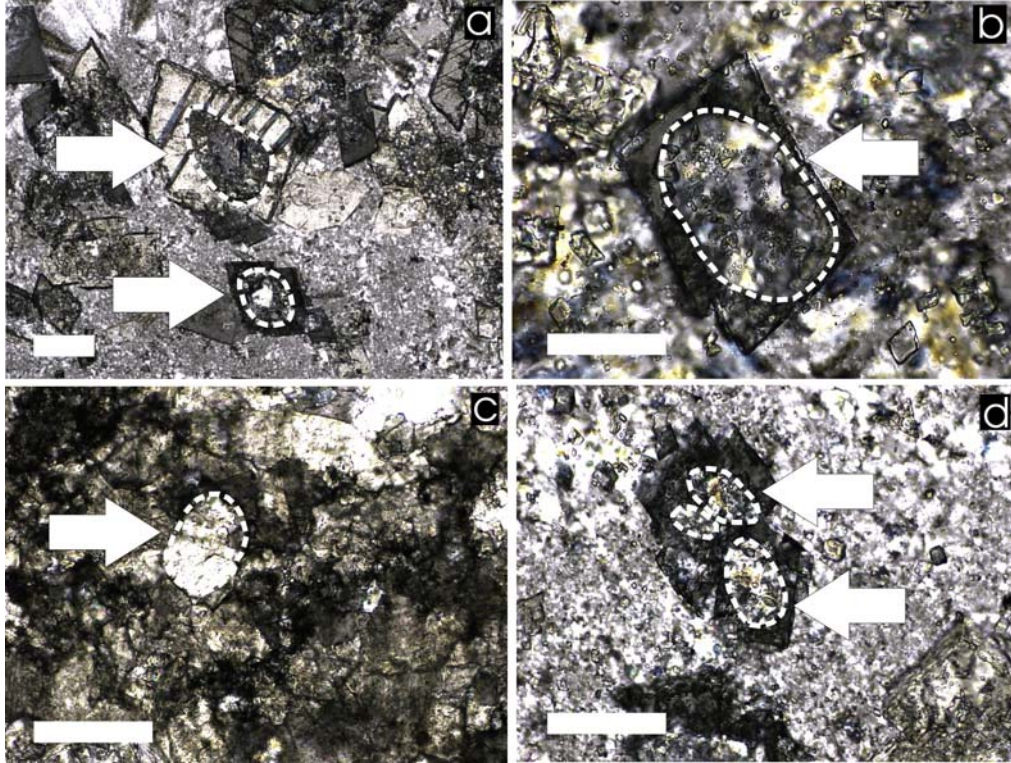

**Supplementary Figure 17:** Thin section photomicrographs showing remnants of rounded grains in four different laminations in “encrusting/domical laminites” from “North Shaw Ridge”. White arrows in (A), (B) and (D) point to rounded cores representing the original sedimentary grains (white dashed lines) inside rhombic dolomite crystal overgrowths. (C) Rounded carbonate grain (arrow) floating in a chert/dolomite matrix. The preservation of grains in this sample is attributed to local silicification that did obliterate primary fabrics. Scale = 100 $\mu$ m. Cross-polarized light.



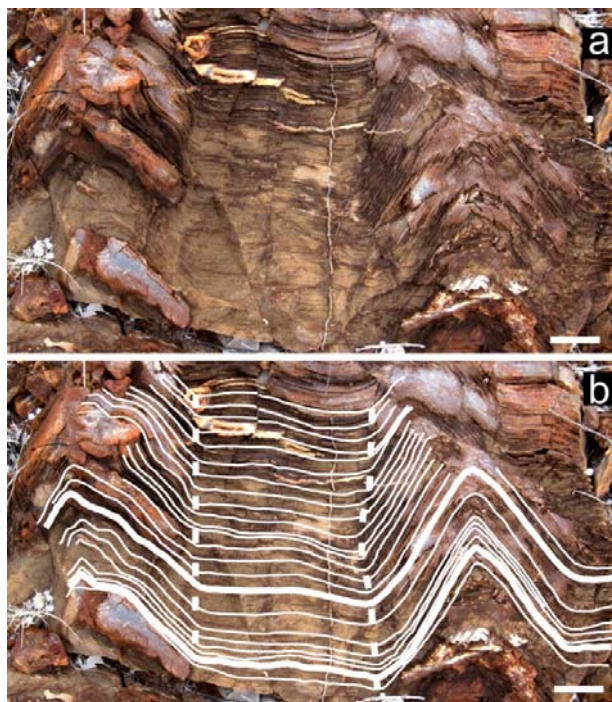

**Supplementary Figure 18:** ‘Large Complex Cone’ (LCC) stromatolites (A) Cross section outcrop of two adjacent structures: (B) same image with traced laminae. Cone dimensions are inherited upsection, resulting in a parallel-sided pseudocolumn.

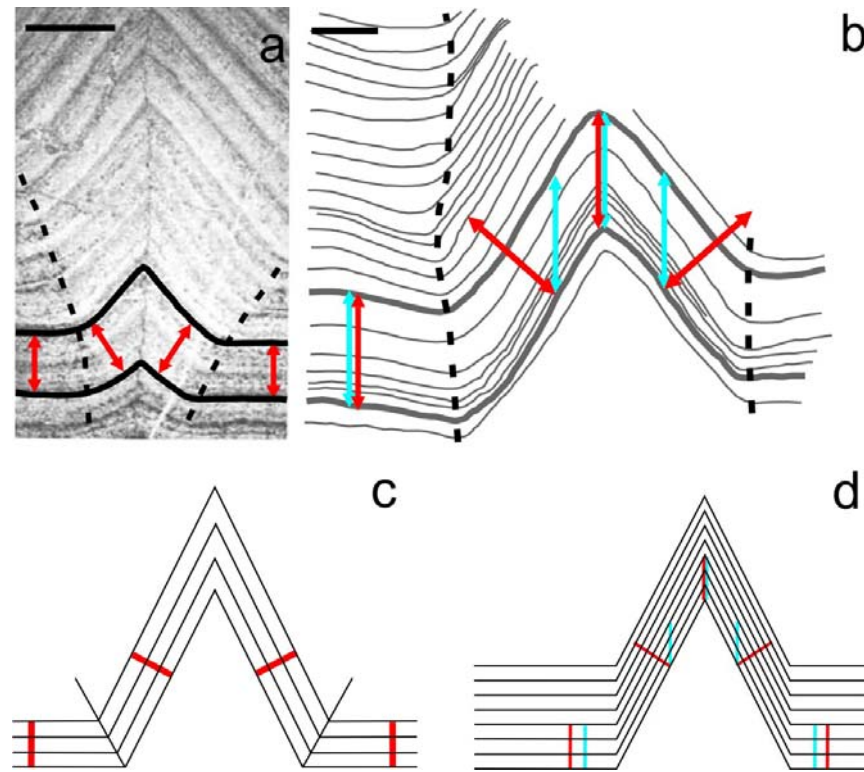

**Supplementary Figure 19:** Comparative cross section geometry of conical pseudocolumnar structures: (A) Photomicrograph of conical structure from uppermost Pethei Group, Canada<sup>8,16</sup> Scale = 300  $\mu\text{m}$ . (B) is transposed tracing of laminae in Supplementary Figure 18: Scale = 5 cm. (C) and (D) are schematic cross sections representing ideal version of the structures in (A) and (B), respectively. Pseudocolumns in (A) and (C) have upward-diverging margins, whereas those in (B) and (D) have parallel margins. True (surface normal) thickness of a bundle of laminae highlighted in (B) measures 5cm thick on the cone slopes, and  $\sim 8.3$  cm everywhere else. The thickness variation is highlighted by the greater number of laminae spanned by the red arrows on the slopes compared to the apex and interspaces. Blue arrows show that vertical thickness or ‘depth’ of the bundle is constant. (D) Shows an ideal parallel-sided pseudocolumn, showing that non-isopachous laminae with constant ‘height’ are pivotal to the structure. (A) and (C) show that stacked isopachous laminae (highlighted by arrows) result in diverging pseudocolumn margins. Part A reprinted, with permission, from the Annual Review of Earth and Planetary Sciences, Volume 27 ©1999 by Annual Reviews [www.annualreviews.org](http://www.annualreviews.org)

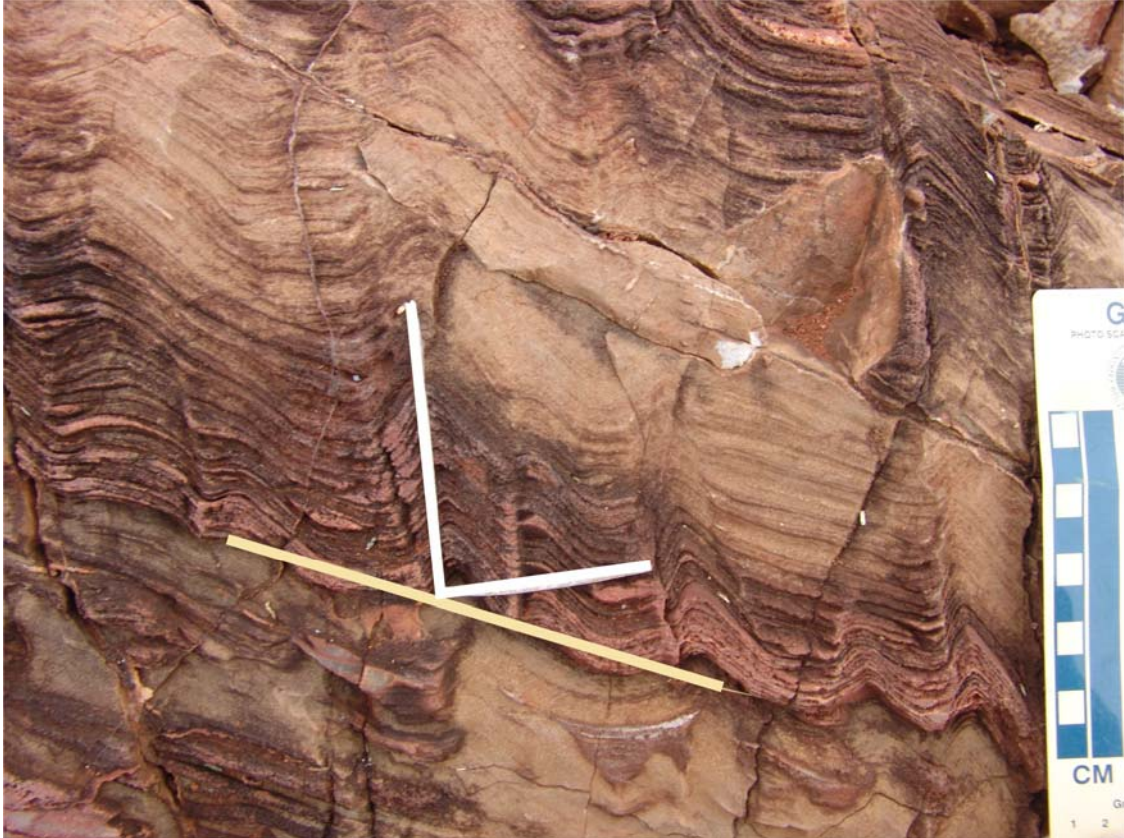

**Supplementary Figure 20:** Cross section outcrop exposure of asymmetric “LCC” structures on a palaeoslope: the white lines at  $90^\circ$  mark out palaeovertical and palaeohorizontal, the oblique line beneath marks the paleoslope, dipping to the right. Note the axes of the stromatolites are aligned to paleovertical.



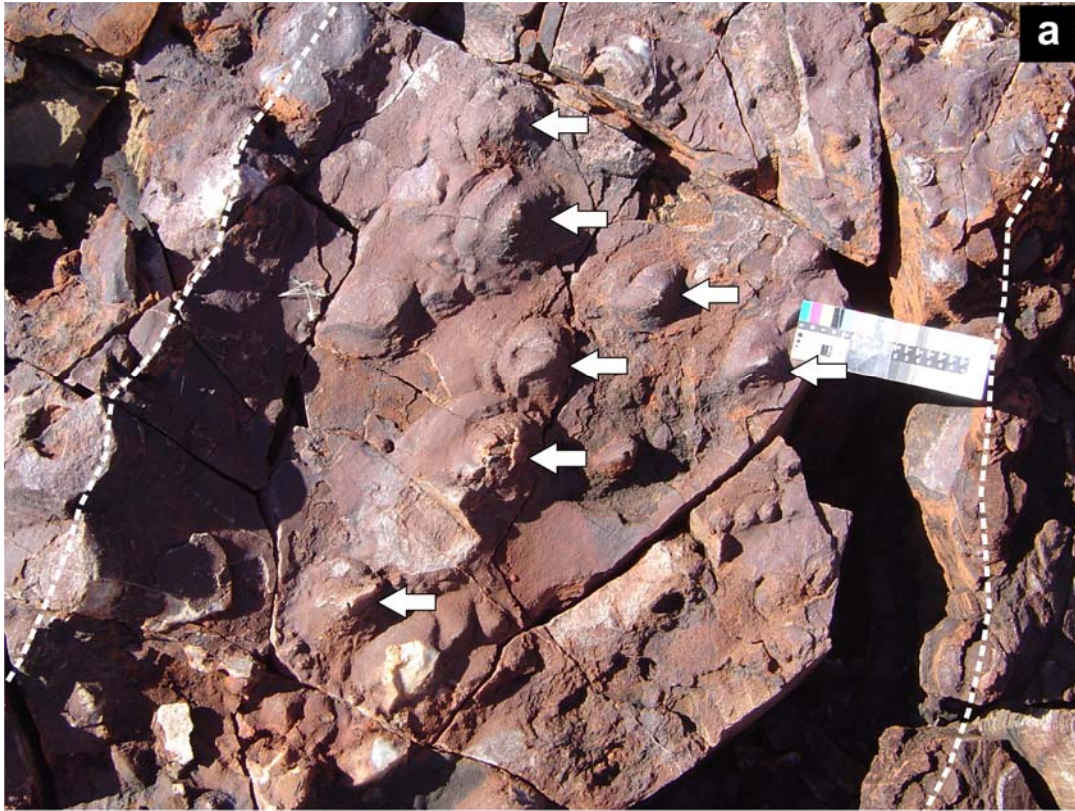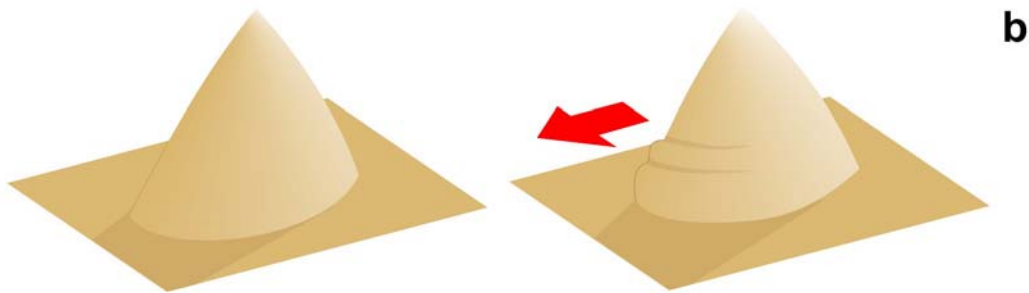

**Supplementary Figure 21:** “Slumped” cones on a cusped swale structure (arrows point to each cone). (A) Overhead bedding plane view of the cusped swale with medium sized cones (6-10 cm diameter). White dotted lines show the ridge crests of the cusped swale. Each of the cones has a bulge on the left hand side, suggesting the cones slumped to the left. Scale card = 20 cm. (B) Schematic diagram illustrating how the bulges could have formed by lateral movement of soft but cohesive cones.

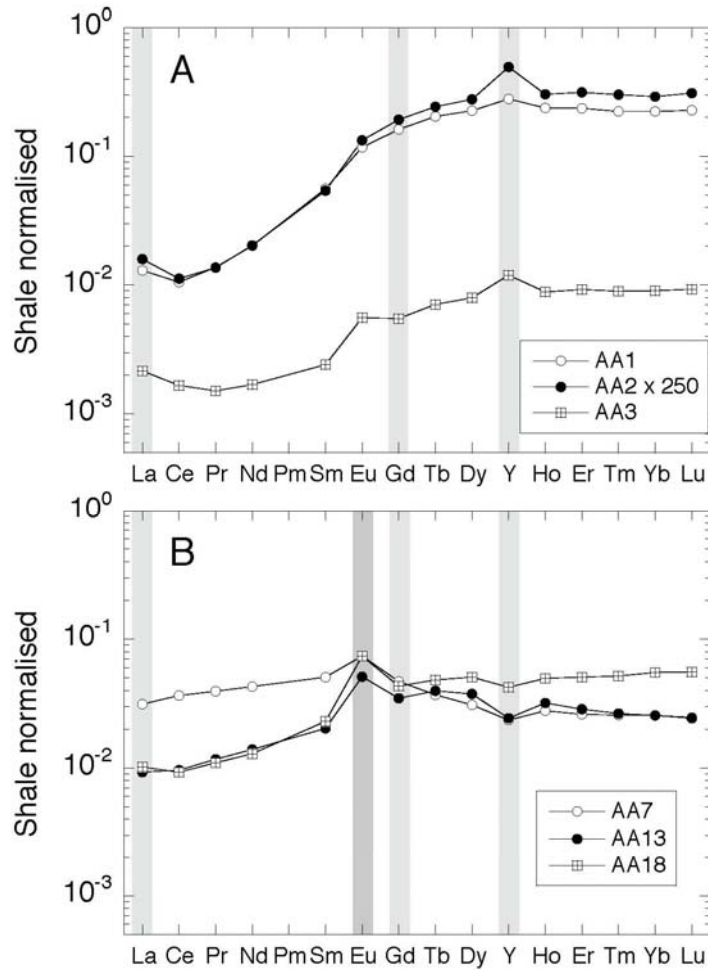

**Supplementary Figure 22:** Relative abundance (vertical axis) of REE for six samples from the Strelley Pool Chert, values normalised to  $\text{MuQ}^{45}$ . AA1= M2 stromatolitic carbonate, AA2= M2 stromatolitic chert, AA3= sedimentary black chert from M3, AA13= sedimentary black chert from underlying strata, AA18= black chert clast from M1, AA7= sedimentary black chert from M4. AA1, AA2 and AA3 have LREE element depletion ( $\text{Pr/Yb}$  of  $\ll 1$ ),  $\text{Y/Ho}$  ratio of  $>30$ , positive La and Gd anomalies, indicating that carbonate and chert formed in a marine environment. AA7, AA13 and AA18 have flat to slightly LREE-depleted patterns and a negative Y anomaly, indicating hydrothermal influence.
