# Supplementary material for: Stromatolite reef from the Early Archaean era of Australia
Source: Springer Nature journal article supplement (doi:10.1038/nature04764), 2006-06-01
Supplement: 41586_2006_BFnature04764_MOESM3_ESM.pdf [file 41586_2006_BFnature04764_MOESM3_ESM.pdf]

**Supplementary Table 1: Description of encrusting / domical laminites**

|                        | <b>Parameter</b>                 | <b>Observations</b>                                                                                                                                                                                                                                                 |
|------------------------|----------------------------------|---------------------------------------------------------------------------------------------------------------------------------------------------------------------------------------------------------------------------------------------------------------------|
| <b>Macrostructure</b>  | Shape                            | Linked domical pseudocolumns. Shape is commonly inherited from an underlying boulder. Pseudocolumns margins commonly diverge upwards                                                                                                                                |
|                        | Dimensions                       | Pseudocolumn height range 50-200 cm. The dimensions of the largest domes cannot be measured because of the mergence of adjacent structures into a series of cumulating mounds that extend beyond the outcrop.                                                       |
|                        | Spacing                          | Mounded (overlapping) to isolated.                                                                                                                                                                                                                                  |
|                        | Linkage                          | Linked. Continuous bridging laminae between pseudocolumns, or pseudocolumns abut one another.                                                                                                                                                                       |
|                        | Lithological variation           | Primary lithology uniform throughout (laminated dolomite and chert). Main lithological variations are associated with diagenetic silicification.                                                                                                                    |
|                        | Attitude                         | Normal (palaeovertical)                                                                                                                                                                                                                                             |
|                        | Plan view                        | Spacing commonly depends on distribution of boulders. No preferential arrangement or alignment observed.                                                                                                                                                            |
| <b>Mesostructure</b>   | 3D Lamina shape                  | Hemispherical to bulbous, rarely nodular (where encrusting a perched boulder). Where not inherited from a boulder, shape is hemispherical to broad bulbous.                                                                                                         |
|                        | Synoptic relief                  | Moderate.                                                                                                                                                                                                                                                           |
|                        | Lamina waviness                  | Smooth, rarely wrinkly.                                                                                                                                                                                                                                             |
|                        | Degree of inheritance of laminae | Low: change is a uniform expansion of structure in all directions                                                                                                                                                                                                   |
|                        | Laminar thickness                | Uniform on large scale, locally variable.                                                                                                                                                                                                                           |
|                        | Laminar continuity               | High                                                                                                                                                                                                                                                                |
|                        | Laminar architecture             | Banded. Carbonate and chert laminae are approximately equal in thickness and have moderately distinct boundaries                                                                                                                                                    |
|                        | Stacking pattern                 | Parallel (non-overlapping) couplets of carbonate and chert laminae. No graded boundaries evident (possibly obscured through diagenesis)                                                                                                                             |
|                        | Laminar fabric                   | Even. Carbonate and chert laminae have similar thickness, grainsize and boundary character.                                                                                                                                                                         |
|                        | Column margins                   | Smooth                                                                                                                                                                                                                                                              |
|                        | Column walls                     | Absent. Laminae extend through an angular (commonly cusped) margin to inter-dome areas                                                                                                                                                                              |
|                        | Other features                   | Small (cm-long) weathered-out crystals are clustered along the laminae of some domes, or in the cusps adjacent to domes. The crystals are oriented normal to the laminae or fan radially from the cusps. Crystals are draped by overlying laminae.                  |
| <b>Micro structure</b> | Fabric                           | Very fine to coarse grained neomorphic fabric: dolomicrite/dolomicrosparry and microcrystalline quartz/megaquartz. Grainsize varies between laminae. Rare, well-preserved examples retain outlines of sand and silt-sized detrital grains, visible in thin section. |

**Supplementary Table 2: Description of large complex cones**

|                        | <b>Parameter</b>                                                                                                                       | <b>Observations</b>                                                                                                                                                                                                                                                                                                                                                                                                                                                                                               |
|------------------------|----------------------------------------------------------------------------------------------------------------------------------------|-------------------------------------------------------------------------------------------------------------------------------------------------------------------------------------------------------------------------------------------------------------------------------------------------------------------------------------------------------------------------------------------------------------------------------------------------------------------------------------------------------------------|
| <b>Macrostructure</b>  | Shape                                                                                                                                  | Linked conical pseudocolumns (Stacked equidimensional cones form a pseudo-cylindrical column but laminae do not truncate at edge of column)                                                                                                                                                                                                                                                                                                                                                                       |
|                        | Dimensions                                                                                                                             | Average pseudocolumn height = 47cm; width ~ 11 cm. Height is commonly truncated by limit of outcrop.                                                                                                                                                                                                                                                                                                                                                                                                              |
|                        | Spacing                                                                                                                                | Contiguous to isolated.                                                                                                                                                                                                                                                                                                                                                                                                                                                                                           |
|                        | Linkage                                                                                                                                | Linked. Abundant continuous bridging laminae between crests.                                                                                                                                                                                                                                                                                                                                                                                                                                                      |
|                        | Lithological variation                                                                                                                 | Primary lithology uniform throughout (laminated dolomite and chert). Main lithological variations are associated with diagenetic silicification.                                                                                                                                                                                                                                                                                                                                                                  |
|                        | Attitude                                                                                                                               | Normal (palaeovertical), even on local palaeoslopes. Small areas of ponded sediment are not uncommon on the upslope side of such structures, confirming the palaeo horizontal direction.                                                                                                                                                                                                                                                                                                                          |
|                        | Plan view                                                                                                                              | Long axes are typically aligned parallel to one another on a given bedding plane. However, in some cases the axial alignment of structures on a given bedding plane differs by up to 80°                                                                                                                                                                                                                                                                                                                          |
| <b>Mesostructure</b>   | 3D Lamina shape                                                                                                                        | Conical. Steep-sided with angular peaks and margins, and near-circular, elliptical or lanceolate bases                                                                                                                                                                                                                                                                                                                                                                                                            |
|                        | Synoptic relief                                                                                                                        | Moderate to high. Amplitude ~ or > cone diameter                                                                                                                                                                                                                                                                                                                                                                                                                                                                  |
|                        | Lamina waviness                                                                                                                        | Smooth or wavy. Many larger cones are adorned with regularly spaced cm-scale bumps, resulting in a wavy or 'corrugated' laminar profile. Rarely, the bumps are very pronounced                                                                                                                                                                                                                                                                                                                                    |
|                        | Degree of inheritance of laminae                                                                                                       | High. Geometry and all dimensions typically closely copied through successively deposited laminae (local disruption, e.g; in relation to energetic events).                                                                                                                                                                                                                                                                                                                                                       |
|                        | Laminar thickness                                                                                                                      | True thickness, measured normal to surface, is uniform on cone slopes, increases at apex and in inter-cone spaces. However, paleovertical 'depth' is constant. (Thickness was measured by tracing bundles of 10-20 laminae from the inter-column spaces across the cones. This method is more effective than attempting to measure individual laminae, as recrystallization obscures or 'pixelates' boundaries of individual laminae. The margin of error is less significant when measuring numbers of laminae). |
|                        | Laminar continuity                                                                                                                     | High on cones, moderate to high in inter-cone areas.                                                                                                                                                                                                                                                                                                                                                                                                                                                              |
|                        | Laminar architecture                                                                                                                   | Banded. Carbonate and chert laminae are approximately equal in thickness and have moderately distinct boundaries                                                                                                                                                                                                                                                                                                                                                                                                  |
|                        | Stacking pattern                                                                                                                       | Parallel (non-overlapping) couplets of carbonate and chert laminae. No graded boundaries evident (possibly obscured through diagenesis)                                                                                                                                                                                                                                                                                                                                                                           |
|                        | Laminar fabric                                                                                                                         | Even. Carbonate and chert laminae have similar thickness, grain size and boundary character.                                                                                                                                                                                                                                                                                                                                                                                                                      |
|                        | Column margins                                                                                                                         | Smooth. Some inter-column laminae and thin breccia deposits onlap the cone bases. Common scoured troughs at the cone bases are filled with carbonate breccia and draping or onlapping laminae.                                                                                                                                                                                                                                                                                                                    |
| Column walls           | Absent. Laminae do not downturn and envelop previously-formed laminae at the column margins, but continue into the inter-column space. |                                                                                                                                                                                                                                                                                                                                                                                                                                                                                                                   |
| <b>Micro structure</b> | Fabric                                                                                                                                 | Very fine to coarse grained neomorphic fabric: dolomicrite/dolomicrosparry and microcrystalline quartz/megaquartz. Rare carbonaceous wisps parallel to lamination.                                                                                                                                                                                                                                                                                                                                                |

**Supplementary Table 3: Large Complex Cone measurements. N=26**

| Photo # (AA collection) | Location      | Synoptic relief (cm) | Width (cm) | ratio | Measured stratigraphic height (cm) | Slope angle | Left spacing (cm) | Right spacing (cm) | Context                                    | Cone laminae | % laminae truncated on cone | % laminae truncated adj. cone |
|-------------------------|---------------|----------------------|------------|-------|------------------------------------|-------------|-------------------|--------------------|--------------------------------------------|--------------|-----------------------------|-------------------------------|
| 090603-7                | "Trendall R." | 9                    | 14         | 0.64  | 75                                 | 56          | 0                 | 4                  |                                            | Flat, even.  | 0                           | 5                             |
| 090603-16               | "Trendall R." | 8                    | 9          | 0.89  | 50                                 | 63          | 15                | 20+                | Full height not known.                     | Slight bumpy | 0                           | 20                            |
| 090603-25b              | "Trendall R." | 8                    | 9          | 0.89  | 35                                 | 63          | 0                 | 0                  | Palaeoslope                                | Flat, even.  | <5                          | 40                            |
| 1060603-5               | "Trendall R." | 5                    | 6          | 0.83  | 20                                 | 50          | 8                 | 1                  | Full height not known.                     | Flat, even.  | <5                          | 10                            |
| 130603-1620             | "Trendall R." | 10                   | 13         | 0.77  | 55                                 | 56          | 14                | 20+                | Full height not known.                     | Flat, even.  | 0                           | 10                            |
| 130603-1620             | "Trendall R." | 11                   | 13         | 0.85  | 45                                 | 60          | 20+               | 15                 | Full height not known.                     | Wavy, even   | 0                           | 10                            |
| 130603-1622             | "Trendall R." | 10                   | 5          | 2.00  | 20                                 | 72          | 0                 | 20+                | Apparent steepness. Full height not known. | Flat, even.  | 0                           | 70                            |
| 130603-1624             | "Trendall R." | 4                    | 5          | 0.80  | 32                                 | 56          | 20+               | 20+                | Full height not known.                     | Flat, even.  | ?                           | 60                            |
| 120603-39               | "Trendall R." | 10                   | 15         | 0.67  | 90                                 | 52          | 0                 | 9                  | Full height not known.                     | Flat, even.  | <5                          | 60                            |
| 260804-f828-33          | "Trendall R." | 10                   | 15         | 0.67  | 45                                 | 52          | 5                 | 5+                 | Full height not known.                     | Wavy, even   | 0                           | 10                            |
| 260804-f828-34          | "Trendall R." | 6                    | 14         | 0.43  | 30                                 | 42          | 6                 | 5+                 | Full height not known.                     | Wavy, even   | 0                           | 20                            |
| 260804-f828-36          | "Trendall R." | 14                   | 12         | 1.17  | 55                                 | 65          | 5+                | 5+                 | Full height not known.                     | Wavy, even   | 0                           | 60                            |
| 260804-f828-38          | "Trendall R." | 6                    | 8          | 0.75  | 20                                 | 56          | 3                 | 2                  | Full height not known.                     | Wavy, even   | 0                           | 80                            |
| 260804-f828-58          | "Trendall R." | 9                    | 12         | 0.75  | 22                                 | 55          | 0                 | 6                  | Palaeoslope. Full height not known.        | Wavy, even   | <5                          | 50                            |

| Photo # (AA collection) | Location        | Synoptic relief (cm) | Width (cm)   | ratio       | Measured stratigraphic height (cm) | Slope angle  | Left spacing (cm) | Right spacing (cm) | Context                             | Cone laminae | % laminae truncated on cone | % laminae truncated adj. cone |
|-------------------------|-----------------|----------------------|--------------|-------------|------------------------------------|--------------|-------------------|--------------------|-------------------------------------|--------------|-----------------------------|-------------------------------|
| 300804-f828-9           | "Trendall R."   | 18                   | 20           | 0.90        | 125                                | 60           | 2                 | 20+                | Full height not known.              | Flat, even.  | <5                          | 60                            |
| 300804-f828-10          | "Trendall R."   | 3                    | 4            | 0.75        | 9                                  | 58           | 20+               | 20+                | Palaeoslope                         | Flat, even.  | 0                           | 10                            |
| 300804-f828-12          | "Trendall R."   | 19                   | 28           | 0.68        | 110                                | 59           | 5                 | 3                  | Palaeoslope. Full height not known. | Wavy, even   | 0                           | 10                            |
| 300804-f828-13          | "Trendall R."   | 6                    | 8            | 0.75        | 35                                 | 52           | 20+               | 5                  | Full height not known.              | Flat, even.  | <5                          | 10                            |
| 300804-f828-14          | "Trendall R."   | 7                    | 8            | 0.88        | 30                                 | 52           | 3                 | 4                  | Full height not known.              | Flat, even.  | 0                           | 50                            |
| 300804-f828-14          | "Trendall R."   | 7                    | 8            | 0.88        | 21                                 | 53           | 4                 | 1                  | Full height not known.              | Flat, even.  | 0                           | 50                            |
| 300804-f828-14          | "Trendall R."   | 7                    | 8            | 0.88        | 33                                 | 52           | 1                 | 5                  | Full height not known.              | Flat, even.  | 0                           | 50                            |
| 300804-f828-29          | "Trendall R."   | 9                    | 9            | 1.00        | 85                                 | 60           | 3                 | 4                  | Full height not known.              | Flat, even.  | 0                           | 40                            |
| 040704-6                | "Trendall R."   | 16                   | 16           | 1.00        | 95                                 | 61           | 10                | 12                 | Full height not known.              | Wavy, even   | 0                           | 30                            |
| 060704-f828-22          | "North Shaw R." | 8                    | 9            | 0.89        | 41                                 | 59           | 1                 | 2                  | Full height not known.              | Wavy, even   | 0                           | 80                            |
| 060704-f828-23          | "North Shaw R." | 9                    | 10           | 0.90        | 32                                 | 59           | 5                 | 0                  | Full height not known.              | Wavy, even   | 0                           | 70                            |
| 110704-f828-23          | "Bierf R."      | 4                    | 4            | 1.00        | 12                                 | 60           | 3                 | 2+                 | Full height not known.              | Flat, even.  | <5                          | 30                            |
| <b>Average</b>          |                 | <b>8.96</b>          | <b>10.85</b> | <b>0.87</b> | <b>47.00</b>                       | <b>57.04</b> |                   |                    |                                     |              |                             | <b>38.27</b>                  |
| <b>Standard Dev.</b>    |                 | <b>3.88</b>          | <b>5.13</b>  | <b>0.26</b> |                                    | <b>5.61</b>  |                   |                    |                                     |              |                             | <b>23.92</b>                  |
| <b>Max</b>              |                 | <b>19</b>            | <b>28</b>    | <b>2.00</b> | <b>125</b>                         | <b>72</b>    |                   |                    |                                     |              |                             | <b>80</b>                     |
| <b>Min</b>              |                 | <b>3</b>             | <b>4</b>     | <b>0.43</b> | <b>9</b>                           | <b>42</b>    |                   |                    |                                     |              |                             | <b>5</b>                      |

**Supplementary Table 3 Explanation:** "**Synoptic relief**" is amplitude of a single conical lamina and represents the height of the structure at the palaeosurface. Where cone is asymmetrical (palaeoslope position), synoptic relief is taken at the centre of the cone to the projected baseline. "**Width**" is the average width of the pseudocolumn. "**Slope angle**" is gradient of cone slope relative to palaeohorizontal. Slope angle for cones on palaeoslope is taken as angle between slope and a baseline drawn normal to the vertical axis. "**Slightly off apex**" means the cone measured appears to be intersected slightly to one side of its apex (as indicated by a rounded top). "**Height**" is stratigraphic height of pseudocolumn. "Full height not known" means base and/or top of pseudocolumn does not appear in outcrop. "**Synoptic relief**" and "average slope angle" are taken from one representative cone within the column. "**% laminae truncated...**" is a visual estimate of the percentage of laminae on the cone and in the intercone spaces that are truncated (via downlap, onlap, pinchout, scour). "**Left/Right spacing**" is the distance to the adjacent pseudocolumn: "+" symbol indicates distance to end of outcrop.

**Supplementary Table 4: Description of egg carton laminites**

|                        | <b>Parameter</b>                 | <b>Observations</b>                                                                                                                                                                                           |
|------------------------|----------------------------------|---------------------------------------------------------------------------------------------------------------------------------------------------------------------------------------------------------------|
| <b>Macrostructure</b>  | Shape                            | Short, linked conical pseudocolumns (Stacked equidimensional cones form a short pseudo-cylindrical column but laminae do not truncate at edge of column)                                                      |
|                        | Dimensions                       | Typical pseudocolumn height ~ 3-8 cm; width ~ 2-3 cm.                                                                                                                                                         |
|                        | Spacing                          | Contiguous (for lateral series of ~3 to >10 cones. Abrupt lateral change to flat laminite at end of series)                                                                                                   |
|                        | Linkage                          | Linked. Abundant continuous bridging laminae between pseudocolumns                                                                                                                                            |
|                        | Lithological variation           | Primary lithology uniform throughout (laminated dolomite and chert). Main lithological variations are associated with diagenetic silicification.                                                              |
|                        | Attitude                         | Normal (palaeovertical), even on local palaeoslopes                                                                                                                                                           |
|                        | Plan view                        | Regularly-spaced cones with little or no distinct axial alignment                                                                                                                                             |
| <b>Mesostructure</b>   | 3D Lamina shape                  | Conical. Moderately steep to steep-sided with angular to slightly rounded peaks and rounded margins, and near-circular bases                                                                                  |
|                        | Synoptic relief                  | Moderate. Amplitude ~ cone diameter.                                                                                                                                                                          |
|                        | Lamina waviness                  | Smooth                                                                                                                                                                                                        |
|                        | Degree of inheritance of laminae | High. Geometry and all dimensions typically closely copied through successively deposited laminae (local disruption, e.g; in relation to energetic events).                                                   |
|                        | Laminar thickness                | True thickness, measured normal to surface, is uniform on cone slopes, increases at apex and in inter-cone spaces. However, paleovertical 'depth' is constant. (Thickness was measured as per LCC structures) |
|                        | Laminar continuity               | High                                                                                                                                                                                                          |
|                        | Laminar architecture             | Banded. Carbonate and chert laminae are approximately equal in thickness and have moderately distinct boundaries                                                                                              |
|                        | Stacking pattern                 | Parallel (non-overlapping) couplets of carbonate and chert laminae. No graded boundaries evident (possibly obscured through diagenesis)                                                                       |
|                        | Laminar fabric                   | Even. Carbonate and chert laminae have similar thickness, grainsize and boundary character.                                                                                                                   |
|                        | Column margins                   | Smooth. Some inter-column laminae and thin breccia deposits onlap the cone bases.                                                                                                                             |
|                        | Column walls                     | Absent. Laminae do not downturn and envelop previously-formed laminae at the column margins, but continue to the next cone or into the inter-column space.                                                    |
| <b>Micro structure</b> | Fabric                           | Very fine to coarse grained neomorphic fabric: dolomicrite/dolomicrosparry and microcrystalline quartz/megaquartz                                                                                             |

**Supplementary Table 5: Description of cusped swales**

|                        | <b>Parameter</b>                                                                                                                                                                     | <b>Observations</b>                                                                                                                                                                                                                                                                                                                                                                                                                             |
|------------------------|--------------------------------------------------------------------------------------------------------------------------------------------------------------------------------------|-------------------------------------------------------------------------------------------------------------------------------------------------------------------------------------------------------------------------------------------------------------------------------------------------------------------------------------------------------------------------------------------------------------------------------------------------|
| <b>Macrostructure</b>  | Shape                                                                                                                                                                                | Compound - linked low relief sub-conical pseudocolumns/web-like crested ridge networks: Broad, low-relief cones with concave-upward sides are linked by a web-like network of saddle-shaped ridges. The ridges radiate from the crest of one pseudo-cone to the next. In profile view, the crests are stacked to form 'marginless' linked pseudocolumns (i.e; slope of laminae curves gently between crest and trough with no distinct margin). |
|                        | Dimensions                                                                                                                                                                           | Lateral distance between peaks ~30 cm to >1 m. Height of stacked crests commonly >2 m.                                                                                                                                                                                                                                                                                                                                                          |
|                        | Spacing                                                                                                                                                                              | Contiguous                                                                                                                                                                                                                                                                                                                                                                                                                                      |
|                        | Linkage                                                                                                                                                                              | Linked. Continuous bridging laminae between pseudocolumns                                                                                                                                                                                                                                                                                                                                                                                       |
|                        | Lithological variation                                                                                                                                                               | Primary lithology uniform throughout (laminated dolomite and chert). Main lithological variations are associated with diagenetic silicification.                                                                                                                                                                                                                                                                                                |
|                        | Attitude                                                                                                                                                                             | Normal (palaeovertical)                                                                                                                                                                                                                                                                                                                                                                                                                         |
|                        | Plan view                                                                                                                                                                            | See above                                                                                                                                                                                                                                                                                                                                                                                                                                       |
| <b>Mesostructure</b>   | 3D Lamina shape                                                                                                                                                                      | See above                                                                                                                                                                                                                                                                                                                                                                                                                                       |
|                        | Synoptic relief                                                                                                                                                                      | Low. Amplitude (~10-30 cm) << width (~50-200 cm)                                                                                                                                                                                                                                                                                                                                                                                                |
|                        | Lamina waviness                                                                                                                                                                      | Smooth to wavy, rarely wrinkly. Waviness occurs only around crests - troughs are smooth.                                                                                                                                                                                                                                                                                                                                                        |
|                        | Degree of inheritance of laminae                                                                                                                                                     | High. Geometry and all dimensions typically closely copied through successively deposited laminae                                                                                                                                                                                                                                                                                                                                               |
|                        | Laminar thickness                                                                                                                                                                    | Thins slightly from the troughs to the upper slopes (true thickness). Palaevertical depth is constant.                                                                                                                                                                                                                                                                                                                                          |
|                        | Laminar continuity                                                                                                                                                                   | High                                                                                                                                                                                                                                                                                                                                                                                                                                            |
|                        | Laminar architecture                                                                                                                                                                 | Banded. Carbonate and chert laminae are approximately equal in thickness and have moderately distinct boundaries                                                                                                                                                                                                                                                                                                                                |
|                        | Stacking pattern                                                                                                                                                                     | Parallel (non-overlapping) couplets of carbonate and chert laminae. No graded boundaries evident (possibly obscured through diagenesis)                                                                                                                                                                                                                                                                                                         |
|                        | Laminar fabric                                                                                                                                                                       | Even. Carbonate and chert laminae have similar thickness, grain size and boundary character.                                                                                                                                                                                                                                                                                                                                                    |
|                        | Column margins                                                                                                                                                                       | Smooth                                                                                                                                                                                                                                                                                                                                                                                                                                          |
|                        | Column walls                                                                                                                                                                         | Absent                                                                                                                                                                                                                                                                                                                                                                                                                                          |
| Other features         | Small (cm-long) weathered-out crystals are commonly clustered around the crests of the structures. A few also occur in the troughs. The crystals are oriented normal to the laminae. |                                                                                                                                                                                                                                                                                                                                                                                                                                                 |
| <b>Micro structure</b> | Fabric                                                                                                                                                                               | Very fine to coarse grained neomorphic fabric: dolomicrite/dolomicrosparry and microcrystalline quartz/megaquartz                                                                                                                                                                                                                                                                                                                               |

**Supplementary Table 6: Description of small crested/conical laminites**

|                        | <b>Parameter</b>                 | <b>Observations</b>                                                                                                                                                                                                                               |
|------------------------|----------------------------------|---------------------------------------------------------------------------------------------------------------------------------------------------------------------------------------------------------------------------------------------------|
| <b>Macrostructure</b>  | Shape                            | Linked conical pseudocolumns and web-like ridge networks.                                                                                                                                                                                         |
|                        | Dimensions                       | Pseudocolumns: typical height 5-50 cm; width ~ 1-2 cm. Ridge networks: ridge spacing typically 2-10 cm, height 5-50 cm                                                                                                                            |
|                        | Spacing                          | Contiguous to isolated                                                                                                                                                                                                                            |
|                        | Linkage                          | Linked. Most or all laminae are continuous between crests.                                                                                                                                                                                        |
|                        | Lithological variation           | Primary lithology uniform throughout (laminated dolomite and chert). Main lithological variations are associated with diagenetic silicification.                                                                                                  |
|                        | Attitude                         | Normal (palaeovertical)                                                                                                                                                                                                                           |
|                        | Plan view                        | Cones are regularly spaced. Distribution is uniform or in some instances the cones are arranged approximately in straight to slightly curved or sinuous lines. Ridges form a regular web-like network with 2 to 4 ridges converging at a junction |
| <b>Mesostructure</b>   | 3D Lamina shape                  | Cones: angular to rounded peaks and basal margins, slopes flat to concave or convex-upward. Ridges: saddle-shaped with cusped (crested) ridge line, concave-upward slopes                                                                         |
|                        | Synoptic relief                  | Moderate. Amplitude ~ cone diameter or ridge width, although margins are commonly gradational.                                                                                                                                                    |
|                        | Lamina waviness                  | Smooth                                                                                                                                                                                                                                            |
|                        | Degree of inheritance of laminae | High. Geometry and all dimensions typically closely copied through successively deposited laminae                                                                                                                                                 |
|                        | Laminar thickness                | True thickness is uniform on cone/ridge slopes, increases at apex and in inter-cone/ridge spaces. However, paleovertical 'depth' is constant.                                                                                                     |
|                        | Laminar continuity               | High                                                                                                                                                                                                                                              |
|                        | Laminar architecture             | Banded. Carbonate and chert laminae are approximately equal in thickness and have moderately distinct boundaries                                                                                                                                  |
|                        | Stacking pattern                 | Parallel (non-overlapping) couplets of carbonate and chert laminae. No graded boundaries evident (possibly obscured through diagenesis)                                                                                                           |
|                        | Laminar fabric                   | Even. Carbonate and chert laminae have similar thickness, grain size and boundary character.                                                                                                                                                      |
|                        | Column margins                   | Smooth                                                                                                                                                                                                                                            |
|                        | Column walls                     | Absent                                                                                                                                                                                                                                            |
|                        | Other features                   | Small (cm-long) weathered-out crystals are common. The crystals are oriented normal to the laminae. Distribution is regular, isolated to clustered.                                                                                               |
| <b>Micro structure</b> | Fabric                           | Very fine to coarse grained neomorphic fabric: dolomicrite/dolomicrosparry and microcrystalline quartz/megaquartz. Rare carbonaceous wisps parallel to lamination.                                                                                |



**Supplementary Table 7: Description of wavy laminites**

|                        | <b>Parameter</b>                 | <b>Observations</b>                                                                                                                                                            |
|------------------------|----------------------------------|--------------------------------------------------------------------------------------------------------------------------------------------------------------------------------|
| <b>Macrostructure</b>  | Shape                            | Linked undulatory structures and conical pseudocolumns                                                                                                                         |
|                        | Dimensions                       | Pseudocolumn height up to 28 cm; width up to ~9 cm. Undulations typically 3-8 cm in wavelength, 3-5 cm in amplitude.                                                           |
|                        | Spacing                          | Contiguous                                                                                                                                                                     |
|                        | Linkage                          | Linked: many continuous laminae but also many truncate tangentially against the adjacent structure.                                                                            |
|                        | Lithological variation           | Primary lithology uniform throughout (laminated dolomite and chert). Main lithological variations are associated with diagenetic silicification.                               |
|                        | Attitude                         | Normal (palaeovertical)                                                                                                                                                        |
|                        | Plan view                        | Regularly spaced, non-aligned to slightly-aligned cones grading to short, rounded ridges (like interference ripples).                                                          |
| <b>Mesostructure</b>   | 3D Lamina shape                  | Spectrum from angular cones to undulose bumps and ridges. Slope angles typically 30-50 degrees.                                                                                |
|                        | Synoptic relief                  | Moderate to low. Amplitude (~3-8 cm) less than or equal to diameter of cone or width of ridge (~3-15 cm)                                                                       |
|                        | Lamina waviness                  | Smooth                                                                                                                                                                         |
|                        | Degree of inheritance of laminae | Low to moderate. Apices commonly migrate and laminae truncate tangentially (cf; migrating ripples), but many short pseudocolumns with moderate to high inheritance also occur. |
|                        | Laminar thickness                | Variable to locally uniform                                                                                                                                                    |
|                        | Laminar continuity               | Moderate to low (many have onlapping clinof orm, drape or trough-fill lens geometry)                                                                                           |
|                        | Laminar architecture             | Banded. Carbonate and chert laminae occur with approximately the same range of thicknesses and have moderately distinct boundaries                                             |
|                        | Stacking pattern                 | Parallel (non-overlapping) to laterally offset couplets of carbonate and chert laminae.                                                                                        |
|                        | Laminar fabric                   | Moderately even. Carbonate and chert laminae have similar thickness, grain size and boundary character.                                                                        |
|                        | Column margins                   | Smooth                                                                                                                                                                         |
|                        | Column walls                     | Absent. Laminae extend through an angular (commonly cusped) margin to inter-dome areas                                                                                         |
| <b>Micro structure</b> | Fabric                           | Very fine to coarse grained neomorphic fabric: dolomicrite/dolomicrosparry and microcrystalline quartz/megaquartz.                                                             |

**Supplementary Table 8: Description of iron-rich laminites**

|                        | <b>Parameter</b>                 | <b>Observations</b>                                                                                                                                                                                                                                                                    |
|------------------------|----------------------------------|----------------------------------------------------------------------------------------------------------------------------------------------------------------------------------------------------------------------------------------------------------------------------------------|
| <b>Macrostructure</b>  | Shape                            | Variable. Stratiform, domical, pseudocolumnar and undulatory forms observed. In some instances the shape is inherited from an underlying conglomerate or crystal bed.                                                                                                                  |
|                        | Dimensions                       | Pseudocolumn height is low (up to ~3 cm) Width highly variable. Thickness of stratiform laminites ~0.3 to 3 cm. Undulations typically 2-5 cm in wavelength, 3-5 cm in amplitude. Domes 1 cm high by 1 cm wide to 10 cm high by 20 cm wide                                              |
|                        | Spacing                          | Contiguous                                                                                                                                                                                                                                                                             |
|                        | Linkage                          | Linked. Abundant continuous bridging laminae between crests.                                                                                                                                                                                                                           |
|                        | Lithological variation           | Composition is >80% iron oxide (hematite) with chert and fenestral voids (lamina-parallel). Enveloping layers are black chert.                                                                                                                                                         |
|                        | Attitude                         | Normal (palaeovertical)                                                                                                                                                                                                                                                                |
|                        | Plan view                        | Irregular.                                                                                                                                                                                                                                                                             |
| <b>Mesostructure</b>   | 3D Lamina shape                  | Variable, including hemispherical to lobate domes, undulatory ripples and wrinkles                                                                                                                                                                                                     |
|                        | Synoptic relief                  | Moderate to low. Amplitude of domes and ripples is less than or equal to diameter of dome or width of ridge. Dimensions see above.                                                                                                                                                     |
|                        | Lamina waviness                  | Smooth or wrinkled                                                                                                                                                                                                                                                                     |
|                        | Degree of inheritance of laminae | Moderate to high                                                                                                                                                                                                                                                                       |
|                        | Laminar thickness                | Variable to locally uniform                                                                                                                                                                                                                                                            |
|                        | Laminar continuity               | Moderate to high                                                                                                                                                                                                                                                                       |
|                        | Laminar architecture             | Lamina have different thicknesses and indistinct boundaries but are laterally continuous.                                                                                                                                                                                              |
|                        | Stacking pattern                 | Parallel (non-overlapping)                                                                                                                                                                                                                                                             |
|                        | Laminar fabric                   | Compound, void-intercalated fabric. Hematite laminae are extremely thin but variable in thickness (<0.2 mm to ~1 mm), shade (red/brown/orange) and boundary character. (distinct/indistinct). Lamina-parallel voids (fenestrae) are abundant and may be quartz cement-filled or empty. |
|                        | Column margins                   | Smooth                                                                                                                                                                                                                                                                                 |
|                        | Column walls                     | Absent                                                                                                                                                                                                                                                                                 |
| <b>Micro structure</b> | Fabric                           | Hematite laminae have a massive to irregular, clotted fabric in thin section. A small amount of granular detritus occurs within the laminae, with some small accumulations in the low areas between domes or ridges.                                                                   |

**Supplementary Table 9: Formation of LCC stromatolite facies**

| <b>Hypothesis</b>                                      | <b>Counterevidence</b>                                                                                                                                                                                                                                                                                            |
|--------------------------------------------------------|-------------------------------------------------------------------------------------------------------------------------------------------------------------------------------------------------------------------------------------------------------------------------------------------------------------------|
| Post-depositional deformation                          | Onlapping, draping and infilling geometries indicating that the structures stood high during deposition; different lamina fabric/architecture in pseudocolumns compared to inter-column spaces; laminar continuity, lateral juxtaposition with other stromatolite forms, restriction to shallow water environment |
| Mechanical or combined mechanical/chemical deposition  | steep slopes, conical shape, heterogeneous spacing, high inheritance; angular peaks and margins, high laminar continuity, different lamina fabric/architecture in pseudocolumns compared to inter-column spaces, lateral juxtaposition with other stromatolite forms                                              |
| Chemical deposition                                    | non-isopachous laminae, parallel-sided pseudocolumnar conical shape, angular peaks and margins, different lamina fabric/architecture in pseudocolumns compared to inter-column spaces, heterogeneous spacing, lateral juxtaposition with other stromatolite forms, restriction to shallow water environment       |
| Microbially mediated chemical +/-mechanical deposition | None                                                                                                                                                                                                                                                                                                              |
